# Supplementary material for: Incorporating social determinants of health into transmission modeling of COVID-19 vaccine in the US: a scoping review
Source: PubMed Central journal article supplement — Lancet Reg Health Am. 2024 Jun 7;35:100806. doi: 10.1016/j.lana.2024.100806 (PMC11214325; doi:10.1016/j.lana.2024.100806), 2024-06-07
Supplement: mmc1.pdf [file mmc1.pdf]

# **Supplementary material**

## **Incorporating Social Determinants of Health into Transmission Modeling of COVID-19 Vaccine in the US: A Scoping Review**

This supplementary material has been provided by the authors to give readers additional information about their work.

## Table of Contents

|                                                                                                         |    |
|---------------------------------------------------------------------------------------------------------|----|
| Supplementary Methods 1. Search strategies in Medline and Embase .....                                  | 3  |
| Supplementary Methods 2. List of included and excluded studies in this review.....                      | 18 |
| Supplementary Table 1: General characteristics of included studies.....                                 | 48 |
| Supplementary Table 2: Characteristics of studies incorporating social determinants of health factors.. | 60 |

## Supplementary Methods 1. Search strategies in Medline and Embase

Search Strategies for Medline (Ovid) and Embase (Elsevier)

- Filters applied for study types using and adapting when necessary the Canadian Agency for Drugs and Technologies in Health (CADTH) filters, [searchfilters.cadth.ca/](http://searchfilters.cadth.ca/), for clinical trials (randomized, controlled, pragmatic, equivalence), systematic review or meta-analysis, or observational, validation, clinical or multi-center studies
- No date limits applied.

October 6, 2022

**Ovid MEDLINE(R)** and Epub Ahead of Print, In-Process, In-Data-Review & Other Non-Indexed Citations, Daily and Versions <1946 to October 05, 2022>

Medline (Ovid) legend:

Field codes:

/ = Medical Subject Heading (MeSH); ti = article title; ab = abstract; kf = keyword heading word; kw = keyword heading (author keywords); ui = unique identifier

Proximity operator: adj#

Truncation: \*

- 1 Models, Theoretical/ or cellular automata/ or fuzzy logic/ or models, biological/ or epidemiological models/ or models, spatial interaction/ or nomograms/ or nonlinear dynamics/ [Theoretical models 1, subject terms] 537634
- 2 Models, Theoretical/ or ((computer or computer-based or computational or epidemi\* or experimental\* or mathematical or statistical or theoretical) adj2 (model or models or modeling or modelling)).ti,ab,kf,kw. [ Theoretical models 2, subject/keyword terms ] 387271
- 3 epidemiological models/ or ("communicable disease" or compartmental or epidemic or epidemical or epidemiolog\*) adj2 (model or models or modeling or modelling)).ti,ab,kf,kw. [Epidemiological models, Epidem models 1, subject/keywords] 11443
- 4 ((SEIR or "susceptible exposed infectious recovered" or "susceptible exposed infect\* recover\*" or "susceptible exposed infect\* remove\*" or SIR or "susceptible infected recovered" or "susceptib\* infect\* recover\*" or "susceptib\* infect\* remove\*" or SIS or "susceptible infected susceptible" or "susceptible infect\* susceptible") adj2 (model or models or modeling or modelling)).ti,ab,kf,kw. [ more epidemiological model keywords, Epidem models 2 ] 2841

- 5 Computer Simulation/ or (((computer or computer-based or computational) adj2 (model or models or modeling or modelling or simulation\* or microsimulation\* or micro-simulation\*)) or "in silico").ti,ab,kf,kw. [Computer simulation subject/keyword terms] 306086
- 6 ((risk or prediction) adj2 (model or models or modeling or modelling)).ti,ab,kf,kw. [Risk models - keywords] 59770
- 7 bayes theorem/ or markov chains/ or (((bayes or bayesian) adj2 (analysis or approach or estimation or forecast\* or method or model\* or prediction or theorem)) or (Markov adj2 (chain or chains or model\* or process\* or " random field\*"))) or ((CTMC or DTMC or MDP or MRF) adj9 (Markov or model\*))).ti,ab,kf,kw. [Bayes/Markov subject/keyword terms] 82230
- 8 (((Math or Mathematical or Dynamic or Dynamical or Stochastic or Deterministic or Discrete-time or Continuous-time or Compartmental or SIR or SEIR or SIRS or SIS or SEIS or SEIRS or Agent-based or "Agent based" or Individual-based or "Individual based" or Individual-level or "Individual level" or "Branching process" or Network) adj2 (model or models or modeling or modelling or "computer simulation\*")) or ((Susceptible\* adj3 (infected or infectious\* or infect\*)) and (model\* or analysis or framework))).ti,ab,kf,kw. [Math modeling terms from DT] 126092
- 9 ((epidemic\* or pandemic\*) adj2 (model or models or modeling\* or modelling or "computer simulation\*" or "forward simulation\*")).ti,ab,kf,kw. [Epidemic/pandemic models - keyword terms] 3694
- 10 Statistics as Topic/ or Space-time clustering/ or Basic reproduction number/ or Stochastic processes/ or (((estimation or statistic\*) adj2 (analys\* or parameter\* or technic or technics or technique or techniques)) or "basic reproduction number" or "reproduction number" or (stochastic adj3 (model\* or process or processes))).ti,ab,kf,kw. [Statistics as topic subject/keyword] 328665
- 11 or/1-10 [Models subset] 1358273
- 12 COVID-19/ or ("2019 novel coronavirus disease\*" or "2019 novel coronavirus epidemic\*" or "2019 novel coronavirus infection\*" or "2019-nCoV disease\*" or "2019-nCoV infection\*" or "coronavirus disease 2" or "coronavirus disease 2010" or "coronavirus disease 2019" or "coronavirus disease-19" or "coronavirus infection 2019" or COVID or "COVID 2019\*" or "COVID-10" or COVID19 or "long COVID" or "nCoV 2019 disease" or "nCoV 2019 infection" or "new coronavirus pneumonia" or "novel coronavirus 2019 disease" or "novel coronavirus 2019 infection" or "novel coronavirus disease 2019" or "novel coronavirus infected pneumonia" or "novel coronavirus infection 2019" or "novel coronavirus pneumonia" or "paucisymptomatic coronavirus disease 2019" or "pediatric multisystem inflammatory syndrome" or "SARS coronavirus 2 infection" or "SARS coronavirus 2 pneumonia" or "SARS-CoV-2 disease"

or "SARS-CoV-2 infection" or "SARS-CoV-2 pneumonia" or "SARS-CoV2 disease" or "SARS-CoV2 infection"  
or "SARSCoV2 disease" or "SARSCoV2 infection" or "severe acute respiratory syndrome 2" or "severe  
acute respiratory syndrome 2 pneumonia" or "severe acute respiratory syndrome coronavirus 2 infection"  
or "severe acute respiratory syndrome coronavirus 2019 infection" or "severe acute respiratory syndrome  
CoV-2 infection" or "Wuhan coronavirus disease" or "Wuhan coronavirus infection").ti,ab,kf,kw. [COVID-  
19 subject/keyword terms] 292054

13 SARS-CoV-2/ or ("2019 nCoV" or "2019 new coronavirus\*" or "2019 novel coronavirus\*" or "2019  
severe acute respiratory syndrome coronavirus 2" or "2019-nCoV" or "coronavirus SARS-2" or "COVID 19  
virus\*" or "HCoV-19" or "Human coronavirus 2019" or "nCoV-2019" or "novel 2019 coronavirus\*" or  
"novel coronavirus 2019" or "novel coronavirus-19" or "SARS Coronavirus 2" or ((SARS-2 or SARS2) and  
(viral or virus\*)) or "SARS-2-CoV" or "SARS-CoV-2" or "SARS-related coronavirus 2" or "Sever acute  
respiratory syndrome coronavirus 2" or "Severe acute respiratory coronavirus 2" or "Severe acute  
respiratory syndorme coronavirus 2" or "Severe acute respiratory syndrome 2 coronavirus" or "Severe  
acute respiratory syndrome 2 virus\*" or SARS-COV-2 or (SARS adj2 ("corona virus 2" or "coronavirus 2" or  
"coronavirus-2")) or "Severe acute respiratory syndrome corona virus 2" or "Severe acute respiratory  
syndrome coronavirus 2019" or "Severe acute respiratory syndrome coronovirus 2" or "Severe acute  
respiratory syndrome coronvirus 2" or "severe acute respiratory syndrome CoV-2 virus" or "Severe acute  
respiratory syndrome related coronavirus 2" or "Severe acute respiratory syndrome virus 2" or "Severe  
acute respiratory syndrome coronavirus 2" or "Wuhan coronavirus\*" or "Wuhan seafood market  
pneumonia virus" or txid2697049).ti,ab,kf,kw. [SARS-COV-2 virus subject/keyword terms] 183036

14 exp animals/ not humans/ 5052226

15 (or/12-13) not 14 [COVID-SARS-COV-2] 296721

16 and/11,15 [Models + COVID/SARS-COV-2 set] 15369

17 Bias/ or selection bias/ or (bias or biases or "epidemiolog\* bias\*" or "imprecision bias\*" or  
ascertainment or overascertainment or overascertain\* or over-ascertain\* or underascertainment\* or  
underascertain\* or under-ascertain\* or undercount\* or ((ascertain\* or imprecision) adj6 bias\*) or (bias\*  
adj3 analys\*) or "selection bias\*" or "information bias\*").ti,ab,kf,kw. [Bias - subject/keyword terms]  
257776

18 Data Accuracy/ or dimensional measurement accuracy/ or "sensitivity and specificity"/ or  
"predictive value of tests"/ or signal-to-noise ratio/ or ((data adj2 (accurac\* or qualit\*)) or ((reliability or  
validit\*) adj2 results) or (validity adj2 reliability) or "measurement error\*" or sensitivity or specificity or

"predictive value\*" or "Signal To Noise Ratio\*" or "Signal-To-Noise Ratio\*").ti,ab,kf,kw. or (quality control/ and data.ti.) [Data quality] 1738749

19 Epidemiologic Methods/ or Epidemiologic Measurements/ or exp Epidemiologic Studies/ or epidemiol\*.ti,kf. [Epidemiol method/measurement/studies subject-keyword terms] 3190550

20 ep.fs. [Epidemiology subheading] 2021937

21 incidence.ti. [Incidence in title] 114978

22 or/19-21 [Epidemiology set] 4376375

23 Biosurveillance/ or population surveillance/ or public health surveillance/ or sentinel surveillance/ or (((data or population or "public health" or sentinel or syndromic) adj2 surveillance) or biosurveillance or "surveillance system\*").ti,ab,kf,kw. [Biosurveillance subject/keyword terms] 102955

24 (Beta ad2 transmission or Dispersion or (Duration adj2 (latent or latency or incubation or infectiousness)) or "Diagnostic test sensitivity" or Importation).ti,ab,kf,kw. [specific parameters - team identified] 89345

25 ("33323424" or "34611158" or "32587997" or "33634345" or "33406053").ui. [Exemplars] 5

26 (Randomized Controlled Trial or Controlled Clinical Trial or Pragmatic Clinical Trial or Equivalence Trial or Clinical Trial, Phase III).pt. 672914

27 Randomized Controlled Trial/ or Equivalence Trial/ or Pragmatic Clinical Trial/ 579514

28 exp Randomized Controlled Trials as Topic/ 161821

29 "Randomized Controlled Trial\*".ti,ab,hw,kf,kw. 809894

30 Controlled Clinical Trial/95054

31 exp Controlled Clinical Trials as Topic/ 167507

32 Randomization/106884

33 Random Allocation/ 106884

34 Double-Blind Method/ 173167

35 Double-Blind Studies/ 173167

36 Single-Blind Method/ 32209

37 Single-Blind Studies/ 32209

38 Placebos/ 35923

39 Placebo\*.ti,ab,hw,kf,kw. 254106

40 Control Groups/ 1860

41 Control Group/ 1860

42 (random\* or sham or placebo\*).ti,ab,hw,kf,kw. 1736633

43 ((singl\* or doubl\*) adj1 (blind\* or dumm\* or mask\*)).ti,ab,hw,kf,kw. 261091

44 ((tripl\* or trebl\*) adj1 (blind\* or dumm\* or mask\*)).ti,ab,hw,kf,kw. 1517

45 (control\* adj3 (study or studies or trial\* or group\*)).ti,ab,kf,kw. 1166270

46 (Nonrandom\* or non random\* or non-random\* or quasi-random\* or quasirandom\*).ti,ab,hw,kf,kw. 51943

47 allocated.ti,ab,hw. 79429

48 ((open label or open-label) adj5 (study or studies or trial\*)).ti,ab,hw,kf,kw. 42295

49 ((equivalence or superiority or non-inferiority or noninferiority) adj3 (study or studies or trial\*)).ti,ab,hw,kf,kw. 11207

50 (pragmatic study or pragmatic studies).ti,ab,hw,kf,kw. 551

51 ((pragmatic or practical) adj3 trial\*).ti,ab,hw,kf,kw. 7190

52 ((quasiexperimental or quasi-experimental) adj3 (study or studies or trial\*)).ti,ab,hw,kf,kw. 11000

53 (phase adj3 (I or "1" or II or "2" or III or "3" or IV or "4") adj3 (study or studies or trial\*)).ti,ab,hw,kf,kw. 155813

54 or/26-53 [RCT-CCT filter - CADTH, Canadian Agency for Drugs and Technologies in Health FILTER] 2567813

55 (systematic review or meta-analysis).pt. 287122

56 meta-analysis/ or systematic review/ or systematic reviews as topic/ or meta-analysis as topic/ or "meta analysis (topic)"/ or "systematic review (topic)"/ or exp technology assessment, biomedical/ or network meta-analysis/ 323769

57 ((systematic\* adj3 (review\* or overview\*)) or (methodologic\* adj3 (review\* or overview\*))).ti,ab,kf. 286725

58 ((quantitative adj3 (review\* or overview\* or synthes\*)) or (research adj3 (integrati\* or overview\*))).ti,ab,kf. 14395

59 ((integrative adj3 (review\* or overview\*)) or (collaborative adj3 (review\* or overview\*)) or (pool\* adj3 analy\*)).ti,ab,kf. 35971

60 (data synthes\* or data extraction\* or data abstraction\*).ti,ab,kf. 36962

61 (handsearch\* or hand search\*).ti,ab,kf. 10717

62 (mantel haenszel or peto or der simonian or dersimonian or fixed effect\* or latin square\*).ti,ab,kf. 33295

63 (met analy\* or metanaly\* or technology assessment\* or HTA or HTAs or technology overview\* or technology appraisal\*).ti,ab,kf. 11498

64 (meta regression\* or metaregression\*).ti,ab,kf. 13170

65 (meta-analy\* or metaanaly\* or systematic review\* or biomedical technology assessment\* or biomedical technology assessment\*).mp,hw. 426877

66 (medline or cochrane or pubmed or medlars or embase or cinahl).ti,ab,hw. 310676

67 (cochrane or (health adj2 technology assessment) or evidence report).jw. 20981

68 (comparative adj3 (efficacy or effectiveness)).ti,ab,kf. 16547

69 (outcomes research or relative effectiveness).ti,ab,kf. 10792

70 ((indirect or indirect treatment or mixed-treatment or bayesian) adj3 comparison\*).ti,ab,kf. 4090

71 (multi\* adj3 treatment adj3 comparison\*).ti,ab,kf. 283

72 (mixed adj3 treatment adj3 (meta-analy\* or metaanaly\*).ti,ab,kf. 176

73 umbrella review\*.ti,ab,kf. 1143

74 (multi\* adj2 paramet\* adj2 evidence adj2 synthesis).ti,ab,kf. 13

75 (multiparamet\* adj2 evidence adj2 synthesis).ti,ab,kf. 17

76 (multi-paramet\* adj2 evidence adj2 synthesis).ti,ab,kf. 11

77 or/55-76 [SRMA Filter - CADTH FILTER] 629101

78 Epidemiologic Methods/ 31606

79 exp Epidemiologic Studies/ 3018840

80 Observational Studies as Topic/ 8172

81 Clinical Studies as Topic/ 763

82 single-case studies as topic/ 97

83 (Observational Study or Validation Studies or Clinical Study).pt. 138222

84 (observational adj3 (study or studies or design or analysis or analyses)).ti,ab,kf. 201390

85 cohort\*.ti,ab,kf.791222

86 (prospective adj7 (study or studies or design or analysis or analyses)).ti,ab,kf. 506550

87 ((follow up or followup) adj7 (study or studies or design or analysis or analyses)).ti,ab,kf. 161549

88 ((longitudinal or longterm or (long adj term)) adj7 (study or studies or design or analysis or analyses or data)).ti,ab,kf. 325932

89 (retrospective adj7 (study or studies or design or analysis or analyses or data or review)).ti,ab,kf. 630690



90 ((case adj control) or (case adj comparison) or (case adj controlled)).ti,ab,kf. 152437

91 (case-referent adj3 (study or studies or design or analysis or analyses)).ti,ab,kf. 633

92 (population adj3 (study or studies or analysis or analyses)).ti,ab,kf. 220720

93 (descriptive adj3 (study or studies or design or analysis or analyses)).ti,ab,kf. 100874

94 ((multidimensional or (multi adj dimensional)) adj3 (study or studies or design or analysis or analyses)).ti,ab,kf. 4607

95 (cross adj sectional adj7 (study or studies or design or research or analysis or analyses or survey or findings)).ti,ab,kf. 399121

96 ((natural adj experiment) or (natural adj experiments)).ti,ab,kf. 2958

97 (quasi adj (experiment or experiments or experimental)).ti,ab,kf. 18555

98 ((non experiment or nonexperiment or non experimental or nonexperimental) adj3 (study or studies or design or analysis or analyses)).ti,ab,kf. 1626

99 (prevalence adj3 (study or studies or analysis or analyses)).ti,ab,kf. 46707

100 case series.ti,ab,kf. 96671

101 case reports.pt. 2294994

102 (case adj3 (report or reports or study or studies or histories)).ti,ab,kf. 933908

103 organizational case studies/ 12625

104 or/78-103 [Observational Studies filter - CADTH FILTER] 6540625

105 "Multicenter Studies as Topic"/ or "Multicenter Study".pt. or ((multicenter or multi-center or multicentre or multi-centre) adj2 (study or studies or trial or trials)).ti,ab,kf,kw. [Multicenter studies filter] 379995

106 or/54,77,104-105 [Combined- RCT-CCT-SRMA-ObservationStudies-MulticenterStudies - FILTERS set] 8655177

107 and/15,17 [Bias + COVID/SARS-COV-2 set] 3594

108 107 and 106 [Bias + COVID/SARS-COV-2 set + FILTERS ] 2308

109 107 and 106 and 22 [Bias + COVID/SARS-COV-2 set + FILTERS + Epidemiology set - Final Bias set] 921

110 and/16,18 [ Data Quality + Models + COVID/SARS-COV-2 set] 1389

111 and/16,18,106 [ Data Quality + Models + COVID/SARS-COV-2 + FILTERS -- Final Data Quality set] 587

112 or/109,111 [ Final combo Bias/Data Quality set 1] 1487

113 16 and 22 [All Models + COVID/SARS-COV-2 + Epidemiology set - Final Models set 1] 5890

114 (or/3-4,8) and 15 and 106 [Selected Epi/Math Models + COVID/SARS-COV-2 + All 3 FILTERS - Final models set 2] 1031

115 16 and (or/23-24) [ Models + COVID/SARS-COV-2 + Biosurveillance/Parameters -- Final models set 3] 425

116 or/113-115 [ Final combo Models set] 6532

117 (or/113-115) not 112 [ Final combo Models set] 6067

118 or/112,117 [Final combined set for both Bias/DataQuality and Models] 7554

119 or/25,112,117 [Final combined set for both Bias/DataQuality and Models finds all 5 exemplars] 7554

120 112 [ Final combo Bias/Data Quality set 1] 1487

121 remove duplicates from 112 [ Final combo Bias/Data Quality set 1] 1463

122 remove duplicates from 113 [All Models + COVID/SARS-COV-2 + Epidemiology set - Final Models set 1] 5840

123 remove duplicates from 114 [ Final models set 2] 1028

124 remove duplicates from 115 [ Final models set 3] 423

125 or/122-124 [**Final models set** - duplicates removed] **6480**

## Embase (Elsevier) October 29, 2022

### Embase legend:

Field codes: ti = article Title, ab = Abstract, kw = Keyword, de = Index (descriptor) term ),

mj = Focused (Descriptor)Index term

Proximity operator: NEAR/#

Truncation: \*

#123 #119 OR #121 **2709 [Model final set]**

#122 #112 535 [Bias final set]

#121 #120 AND (#3 OR #4 OR #7 OR #8 OR #9) 1380

#120 #115 NOT #119 5093

#119 #116 OR #117 OR #118 1329

#118 #115 AND #24 51

#117 #115 AND #23 123

#116 #115 AND #22 1243

#115 #114 NOT #112 6422

#114 #113 NOT ([conference abstract]/lim OR [conference review]/lim) 6658

#113 #17 AND (#53 OR #77 OR #107) 8617

#112 #111 NOT ([conference abstract]/lim OR [conference review]/lim) 535

#111 #109 OR #110 599

#110 #17 AND #18 AND (#53 OR #77 OR #107) 274

#109 #16 AND #18 AND #22 AND (#53 OR #77 OR #107) 377

#108 #16 AND #18 AND (#53 OR #77 OR #107) 3255

#107 #78 OR #79 OR #80 OR #81 OR #82 OR #83 OR #84 OR #85 OR #86 OR #87 OR #88 OR #89 OR #90  
OR #91 OR #92 OR #93 OR #94 OR #95 OR #96 OR #97 OR #98 OR #99 OR #100 OR #101 OR #102 OR #103  
OR #104 OR #105 OR #106 8827590

#106 (case NEAR/3 (report OR reports OR study OR studies OR histories)):ti,ab,kw 1212148

#105 'case report'/de 2881987

#104 'case study'/de OR 'single-case study'/de 89317

#103 case AND series:ti,ab,kw 228542

#102 (prevalence NEAR/3 (study OR studies OR analysis OR analyses)):ti,ab,kw 69021

#101 (('non experiment' OR nonexperiment OR 'non experimental' OR nonexperimental) NEAR/3 (study  
OR studies OR design OR analysis OR analyses)):ti,ab,kw 2352

#100 (quasi NEAR/1 (experiment OR experiments OR experimental)):ti,ab,kw 23157

#99 'natural experiment':ti,ab,kw OR 'natural experiments':ti,ab,kw 3231

#98 (('cross sectional' OR 'cross seccional') NEAR/7 (study OR studies OR design OR research OR  
analysis OR analyses OR survey OR findings)):ti,ab,kw 524334

#97 ((multidimensional OR 'multi dimensional') NEAR/3 (study OR studies OR design OR analysis OR  
analyses)):ti,ab,kw 5463

#96 (descriptive NEAR/3 (study OR studies OR design OR analysis OR analyses)):ti,ab,kw 153665

#95 (population NEAR/3 (study OR studies OR analysis OR analyses)):ti,ab,kw 335353

#94 ('case referent' NEAR/3 (study OR studies OR design OR analysis OR analyses)):ti,ab,kw 698

#93 ((case NEAR/1 control):ti,ab,kw) OR ((case NEAR/1 comparison):ti,ab,kw) OR ((case NEAR/1  
controlled):ti,ab,kw) 203729

#92 (retrospective NEAR/7 (study OR studies OR design OR analysis OR analyses OR data OR  
review)):ti,ab,kw 1055072

#91 ((longitudinal OR longterm OR 'long term') NEAR/7 (study OR studies OR design OR analysis OR  
analyses OR data)):ti,ab,kw 464464

#90 (('follow up' OR followup) NEAR/7 (study OR studies OR design OR analysis OR analyses)):ti,ab,kw  
256890

#89 (prospective NEAR/7 (study OR studies OR design OR analysis OR analyses)):ti,ab,kw 764202

#88 cohort\*:ti,ab,kw 1339101

#87 (observational NEAR/3 (study OR studies OR design OR analysis OR analyses)):ti,ab,kw 314960

#86 'prospective study'/de 805150

#85 'quasi experimental study'/de 10079

#84 'cross-sectional study'/de 513361

#83 'case control study'/exp 211812

#82 'retrospective study'/de 1330973

#81 'follow up'/de 1929096

#80 'longitudinal study'/de 180429

#79 'cohort analysis'/de 910457

#78 'observational study'/de 293200

#77 #54 OR #55 OR #56 OR #57 OR #58 OR #59 OR #60 OR #61 OR #62 OR #63 OR #64 OR #65 OR #66  
OR #67 OR #68 OR #69 OR #70 OR #71 OR #72 OR #73 OR #74 OR #75 OR #76 875268

#76 ('multi paramet\*' NEAR/2 evidence NEAR/2 synthesis):ti,ab,kw 23

#75 (multiparamet\* NEAR/2 evidence NEAR/2 synthesis):ti,ab,kw 42

#74 ((multiparamet\* NEAR/2 evidence):ti,ab,kw) AND synthesis:ti,ab,kw 43

#73 (multi\* NEAR/2 paramet\* NEAR/2 evidence NEAR/2 synthesis):ti,ab,kw 28

#72 'umbrella review\*':ti,ab,kw 1226

#71 (mixed NEAR/3 treatment NEAR/3 ('meta analy\*' OR metaanaly\*)):ti,ab,kw 234

#70 (multi\* NEAR/3 treatment NEAR/3 comparison\*):ti,ab,kw 428

#69 ((indirect OR 'indirect treatment' OR 'mixed treatment') NEAR/1 comparison\*):ti,ab,kw 4979

#68 'outcomes research':ti,ab,kw OR 'relative effectiveness':ti,ab,kw 14463

#67 (comparative NEAR/3 (efficacy OR effectiveness)):ti,ab,kw 21772

#66 cochrane:jt OR ((health NEAR/2 'technology assessment'):jt) OR 'evidence report':jt 27748

#6 5medline:ti,ab,de OR cochrane:ti,ab,de OR pubmed:ti,ab,de OR medlars:ti,ab,de OR  
embase:ti,ab,de OR cinahl:ti,ab,de 338735

#64 'meta-analy\*':de OR metaanaly\*':de OR 'systematic review\*':de OR 'biomedical technology  
assessment\*':de OR 'bio-medical technology assessment\*':de 470241

#63 'meta regressio\*':ti,ab,kw OR metaregression\*':ti,ab,kw 13255

#62 'met analy\*':ti,ab,kw OR metanaly\*':ti,ab,kw OR 'technology assessment\*':ti,ab,kw OR hta:ti,ab,kw OR htas:ti,ab,kw OR 'technology overview\*':ti,ab,kw OR 'technology appraisal\*':ti,ab,kw 16456

#61 'mantel haenszel':ti,ab,kw OR peto:ti,ab,kw OR 'der simonian':ti,ab,kw OR dersimonian:ti,ab,kw OR 'fixed effect\*':ti,ab,kw OR 'latin square\*':ti,ab,kw 38489

#60 handsearch\*':ti,ab,kw OR 'hand search\*':ti,ab,kw 11922

#59 'data synthes\*':ti,ab,kw OR 'data extraction\*':ti,ab,kw OR 'data abstraction\*':ti,ab,kw 38373

#58 ((integrative NEAR/3 (review\* OR overview\*)):ti,ab,kw) OR ((collaborative NEAR/3 (review\* OR overview\*)):ti,ab,kw) OR ((pool\* NEAR/3 analy\*):ti,ab,kw) 43696

#57 ((quantitative NEAR/3 (review\* OR overview\* OR synthes\*)):ti,ab,kw) OR ((research NEAR/3 (integrati\* OR overview\*)):ti,ab,kw) 14625

#56 'systematic review\*':ti,ab,kw OR ((systematic\* NEAR/3 (review\* OR overview\* OR umbrella\*)):ti,ab,kw) OR ((methodologic\* NEAR/3 (review\* OR overview\* OR umbrella\*)):ti,ab,kw) OR ((review\* NEAR/2 (umbrella\* OR overview\*)):ti,ab,kw) 286323

#55 'meta analysis'/de OR 'meta analysis topic'/de OR 'network meta analysis'/de OR 'systematic review'/de OR 'systematic review topic'/de OR 'biomedical technology assessment'/de 469851

#54 [systematic review]/lim OR [meta analysis]/lim 493503

#53 #25 OR #26 OR #27 OR #28 OR #29 OR #30 OR #31 OR #32 OR #33 OR #34 OR #35 OR #36 OR #37 OR #38 OR #39 OR #40 OR #41 OR #42 OR #43 OR #44 OR #45 OR #46 OR #47 OR #48 OR #49 OR #50 OR #51 OR #52 13922766

#52 trial:ti,kw 414081

#51 ((quasiexperimental OR 'quasi experimental') NEAR/3 (study OR studies OR trial\*)):ti,ab,de,kw 17639

#50 ((pragmatic OR practical) NEAR/3 trial\*):ti,ab,de,kw 7767

#49 (pragmatic:ti,ab,de,kw AND study:ti,ab,de,kw OR pragmatic:ti,ab,de,kw) AND studies:ti,ab,de,kw 5914

#48 ((equivalence OR superiority OR 'non inferiority' OR noninferiority) NEAR/3 (study OR studies OR trial\*)):ti,ab,de,kw 16575

#47 (('open label' OR 'open label') NEAR/5 (study OR studies OR trial\*)):ti,ab,de,kw 80588

#46 allocated:ti,ab,de,kw 102898

#45 ((multicent\* OR 'multi cent\*') NEAR/3 (study OR studies OR trial\*)):ti,ab,de,kw 478657

#44 ((crossover OR 'cross over') NEAR/3 (study OR studies OR trial\*)):ti,ab,de,kw 66621

#43 (phase NEAR/3 (study OR studies OR trial\*)):ti,ab,de,kw 370865

#42 (nonrandom\*:ti,ab,de,kw OR non:ti,ab,de,kw) AND random\*:ti,ab,de,kw OR 'non random\*:ti,ab,de,kw OR 'quasi random\*:ti,ab,de,kw OR quasirandom\*:ti,ab,de,kw 376488

#41 (clinical NEAR/3 (study OR studies OR trial\*)):ti,ab,de,kw 6401017

#40 (control\* NEAR/3 (study OR studies OR trial\* OR group\*)):ti,ab,de,kw 10079975

#39 ((tripl\* OR trebl\*) NEAR/1 (blind\* OR dumm\* OR mask\*)):ti,ab,de,kw 1985

#38 ((singl\* OR doubl\*) NEAR/1 (blind\* OR dumm\* OR mask\*)):ti,ab,de,kw 348870

#37 random\*:ti,ab,de,kw OR sham:ti,ab,de,kw OR placebo\*:ti,ab,de,kw 2419890

#36 'crossover procedure'/de 71866

#35 'control group'/de 108885

#34 'placebo'/de 395152

#33 'single blind procedure'/de 48135

#32 'double blind procedure'/de 200759

#31 'randomization'/de 95306

#30 'multicenter study (topic)'/de 38181

#29 'clinical trial'/exp OR 'phase 1 clinical trial'/de OR 'phase 2 clinical trial'/de OR 'phase 3 clinical trial'/de OR 'phase 4 clinical trial'/de 1759981

#28 'clinical study'/de 160859

#27 'multicenter study'/de 339410

#26 'randomized controlled trial'/de OR 'controlled clinical trial'/de OR 'pragmatic trial'/de OR 'controlled study'/de OR 'adaptive clinical trial'/de OR 'equivalence trial'/de 9302855

#25 [randomized controlled trial]/lim OR 'controlled clinical trial'/de 913621

#24 ((beta NEAR/2 transmission):ti,ab,kw) OR dispersion:ti,ab,kw OR ((duration NEAR/2 (latent OR latency OR incubation OR infectiousness)):ti,ab,kw) OR 'diagnostic test sensitivity':ti,ab,kw OR importation:ti,ab,kw 95859

#23 'biosurveillance'/de OR 'disease surveillance'/mj OR 'epidemiological monitoring'/mj OR 'population surveillance'/mj OR 'public health surveillance'/mj OR 'serological surveillance'/mj OR (((data OR population OR 'public health' OR sentinel OR syndromic) NEAR/2 surveillance):ti,ab,kw) OR biosurveillance:ti,ab,kw OR 'surveillance system\*':ti,ab,kw 56332

#22 #20 OR #21 414445

#21 incidence:ti 153826

#20 'epidemiological surveillance'/mj OR epidemiol\*:ti,ab,de,kw 888368

#19 'data accuracy'/exp/mj OR 'data quality'/mj OR 'data validity'/de OR 'sensitivity and specificity'/mj OR ((data NEAR/2 (accurac\* OR qualit\*)):ti,ab,kw) OR (((reliability OR validit\*) NEAR/2 results):ti,ab,kw) OR ((validity NEAR/2 reliability):ti,ab,kw) OR 'measurement error\*':ti,ab,kw OR sensitivity:ti,ab,kw OR specificity:ti,ab,kw OR 'predictive value\*':ti,ab,kw OR 'signal to noise ratio\*':ti,ab,kw OR 'signal-to-noise ratio\*':ti,ab,kw 1799829

#18 'statistical bias'/exp OR 'selection bias'/de OR bias:ti,ab,kw OR biases:ti,ab,kw OR 'epidemiolog\* bias\*':ti,ab,kw OR 'imprecision bias\*':ti,ab,kw OR ascertainment:ti,ab,kw OR overascertainment:ti,ab,kw OR overascertain\*':ti,ab,kw OR 'over ascertain\*':ti,ab,kw OR underascertainment\*':ti,ab,kw OR underascertain\*':ti,ab,kw OR 'under ascertain\*':ti,ab,kw OR undercount\*':ti,ab,kw OR (((ascertain\* OR imprecision) NEAR/6 bias\*):ti,ab,kw) OR ((bias\* NEAR/3 analys\*):ti,ab,kw) OR 'selection bias\*':ti,ab,kw OR 'information bias\*':ti,ab,kw 325829

#17 #11 AND #16 12787

#16 #14 NOT #15 319216

#15 ('animal'/exp OR 'animal experiment'/exp OR 'animal model'/exp OR 'nonhuman'/de OR 'vertebrate'/exp) NOT ('human'/exp OR 'human experiment'/exp) 7620907

#14 #12 OR #13 329740

#13 'severe acute respiratory syndrome coronavirus 2'/mj OR '2019 ncov':ti,ab,kw OR '2019 new coronavirus\*':ti,ab,kw OR '2019 novel coronavirus\*':ti,ab,kw OR '2019 severe acute respiratory syndrome coronavirus 2':ti,ab,kw OR '2019-ncov':ti,ab,kw OR 'coronavirus sars-2':ti,ab,kw OR 'covid 19 virus\*':ti,ab,kw OR 'hcov-19':ti,ab,kw OR 'human coronavirus 2019':ti,ab,kw OR 'ncov-2019':ti,ab,kw OR 'novel 2019 coronavirus\*':ti,ab,kw OR 'novel coronavirus 2019':ti,ab,kw OR 'novel coronavirus-19':ti,ab,kw OR 'sars coronavirus 2':ti,ab,kw OR (('sars 2':ti,ab,kw OR sars2:ti,ab,kw) AND (viral:ti,ab,kw OR virus\*':ti,ab,kw)) OR 'sars-2-cov':ti,ab,kw OR 'sars-cov-2':ti,ab,kw OR 'sars-related coronavirus 2':ti,ab,kw OR 'sever acute respiratory syndrome coronavirus 2':ti,ab,kw OR 'severe acute respiratory coronavirus 2':ti,ab,kw OR 'severe acute respiratory syndorme coronavirus 2':ti,ab,kw OR 'severe acute respiratory syndrome 2 coronavirus':ti,ab,kw OR 'severe acute respiratory syndrome 2 virus\*':ti,ab,kw OR 'sars cov 2':ti,ab,kw OR (sars:ti,ab,kw AND adj2:ti,ab,kw AND ('corona virus 2':ti,ab,kw OR 'coronavirus 2':ti,ab,kw OR 'coronavirus-2':ti,ab,kw)) OR 'severe acute respiratory syndrome corona virus 2':ti,ab,kw OR 'severe acute respiratory syndrome coronavirus 2019':ti,ab,kw OR 'severe acute respiratory syndrome coronoavirus 2':ti,ab,kw OR 'severe acute respiratory syndrome coronvirus 2':ti,ab,kw OR 'severe acute respiratory syndrome cov-2 virus':ti,ab,kw OR 'severe acute respiratory syndrome related coronavirus 2':ti,ab,kw OR 'severe acute respiratory syndrome virus 2':ti,ab,kw OR 'severe acute respiratory syndrome

coronavirus 2':ti,ab,kw OR 'wuhan coronavirus\*':ti,ab,kw OR 'wuhan seafood market pneumonia virus':ti,ab,kw OR txid2697049:ti,ab,kw 117323

#12 'coronavirus disease 2019'/mj OR '2019 novel coronavirus disease\*':ti,ab,kw OR '2019 novel coronavirus epidemic\*':ti,ab,kw OR '2019 novel coronavirus infection\*':ti,ab,kw OR '2019-ncov disease\*':ti,ab,kw OR '2019-ncov infection\*':ti,ab,kw OR 'coronavirus disease 2':ti,ab,kw OR 'coronavirus disease 2010':ti,ab,kw OR 'coronavirus disease 2019':ti,ab,kw OR 'coronavirus disease-19':ti,ab,kw OR 'coronavirus infection 2019':ti,ab,kw OR covid:ti,ab,kw OR 'covid 2019\*':ti,ab,kw OR 'covid-10':ti,ab,kw OR covid19:ti,ab,kw OR 'long covid':ti,ab,kw OR 'ncov 2019 disease':ti,ab,kw OR 'ncov 2019 infection':ti,ab,kw OR 'new coronavirus pneumonia':ti,ab,kw OR 'novel coronavirus 2019 disease':ti,ab,kw OR 'novel coronavirus 2019 infection':ti,ab,kw OR 'novel coronavirus disease 2019':ti,ab,kw OR 'novel coronavirus infected pneumonia':ti,ab,kw OR 'novel coronavirus infection 2019':ti,ab,kw OR 'novel coronavirus pneumonia':ti,ab,kw OR 'paucisymptomatic coronavirus disease 2019':ti,ab,kw OR 'pediatric multisystem inflammatory syndrome':ti,ab,kw OR 'sars coronavirus 2 infection':ti,ab,kw OR 'sars coronavirus 2 pneumonia':ti,ab,kw OR 'sars-cov-2 disease':ti,ab,kw OR 'sars-cov-2 infection':ti,ab,kw OR 'sars-cov-2 pneumonia':ti,ab,kw OR 'sars-cov2 disease':ti,ab,kw OR 'sars-cov2 infection':ti,ab,kw OR 'sarscov2 disease':ti,ab,kw OR 'sarscov2 infection':ti,ab,kw OR 'severe acute respiratory syndrome 2':ti,ab,kw OR 'severe acute respiratory syndrome 2 pneumonia':ti,ab,kw OR 'severe acute respiratory syndrome coronavirus 2 infection':ti,ab,kw OR 'severe acute respiratory syndrome coronavirus 2019 infection':ti,ab,kw OR 'severe acute respiratory syndrome cov-2 infection':ti,ab,kw OR 'wuhan coronavirus disease':ti,ab,kw OR 'wuhan coronavirus infection':ti,ab,kw 316263

#11 #1 OR #2 OR #3 OR #4 OR #5 OR #6 OR #7 OR #8 OR #9 OR #10 997409

#10 'basic reproduction number'/mj OR 'spatiotemporal analysis'/mj OR (((estimation OR statistic\*) NEAR/2 (analys\* OR parameter\* OR technic OR technics OR technique OR techniques)):ti,ab,kw) OR 'basic reproduction number':ti,ab,kw OR 'reproduction number':ti,ab,kw OR ((stochastic NEAR/3 (model\* OR process OR processes)):ti,ab,kw) 363384

#9 ((epidemic\* OR pandemic\*) NEAR/2 (model OR models OR modeling OR modelling OR 'computer simulation\*' OR 'forward simulation\*')):ti,ab,kw 3207

#8 'mathematical model'/mj OR 'cellular automaton'/exp/mj OR 'stochastic model'/mj OR (((math OR mathematical OR dynamic OR dynamical OR stochastic OR deterministic OR 'discrete time' OR 'continuous time' OR compartmental OR sir OR seir OR sirs OR sis OR seis OR seirs OR 'agent based' OR 'agent based' OR 'individual based' OR 'individual based' OR 'individual level' OR 'individual level' OR 'branching process' OR network) NEAR/2 (model OR models OR modeling OR modelling OR 'computer



simulation\*)):ti,ab,kw) OR (((susceptible\* NEAR/3 (infected OR infectious\* OR infect\*)):ti,ab,kw) AND (model\*:ti,ab,kw OR analysis:ti,ab,kw OR framework:ti,ab,kw)) 168184

#7 'bayes theorem'/mj OR 'markov chain'/exp/mj OR (((bayes OR bayesian) NEAR/2 (analysis OR approach OR estimation OR forecast\* OR method OR model\* OR prediction OR theorem)):ti,ab,kw) OR ((markov NEAR/2 (chain OR chains OR model\* OR process\* OR 'random field\*')):ti,ab,kw) OR (((ctmc OR dtmc OR mdp OR mrf) NEAR/9 (markov OR model\*)):ti,ab,kw) 66064

#6 ((risk OR prediction) NEAR/2 (model OR models OR modeling OR modelling)):ti,ab,kw 81625

#5 'computer simulation'/mj OR (((computer OR 'computer based' OR computational) NEAR/2 (model OR models OR modeling OR modelling OR simulation\* OR microsimulation\* OR 'micro simulation\*')):ti,ab,kw) OR 'in silico':ti,ab,kw 177551

#4 ((seir OR 'susceptible exposed infected recovered' OR 'susceptible exposed infectious recovered' OR 'susceptible exposed infective recovered' OR 'susceptible exposed infected recovery' OR 'susceptible exposed infectious recovery' OR 'susceptible exposed infective recovery' OR 'susceptible exposed infected removed' OR 'susceptible exposed infectious removed' OR 'susceptible exposed infective removed' OR sir OR 'susceptibility infection recovery' OR 'susceptible infected and removed' OR 'susceptible infected recovered' OR 'susceptible infected recovered' OR 'susceptible infected recovery' OR 'susceptible infected removed' OR 'susceptible infected removed' OR 'susceptible infection recovered' OR 'susceptible infectious recovered' OR 'susceptible infectious recovered' OR 'susceptible infectious recovery' OR 'susceptible infectious removed' OR 'susceptible infectious removed' OR 'susceptible infectious removed' OR 'susceptible infective recovered' OR 'susceptible infective recovery' OR 'susceptible infective removed' OR 'susceptible infective removed' OR 'susceptive infective removal' OR sis OR 'susceptible infected susceptible' OR 'susceptible infectious susceptible' OR 'susceptible infective susceptible') NEAR/2 (model OR models OR modeling OR modelling)):ti,ab,kw 2633

#3 'epidemiological model'/exp/mj OR ((('communicable disease' OR compartmental OR epidemic OR epidemical OR epidemiolog\*) NEAR/2 (model OR models OR modeling OR modelling)):ti,ab,kw) 12885

#2 'theoretical model'/mj OR (((computer OR 'computer based' OR computational OR epidemi\* OR experimental\* OR mathematical OR statistical OR theoretical) NEAR/2 (model OR models OR modeling OR modelling)):ti,ab,kw) 330547

#1 'theoretical model'/mj OR 'fuzzy logic'/mj OR 'disease simulation'/mj 38560

## Supplementary Methods 2. List of included and excluded studies in this review

### A. List of included studies in this review (92 studies)

1. Bartsch SM, O'Shea KJ, Ferguson MC, Bottazzi ME, Wedlock PT, Strych U, et al. Vaccine efficacy needed for a COVID-19 coronavirus vaccine to prevent or stop an epidemic as the sole intervention. *American journal of preventive medicine*. 2020;59(4):493-503.
2. Matrajt L, Eaton J, Leung T, Brown ER. Vaccine optimization for COVID-19: who to vaccinate first? medRxiv: the preprint server for health sciences. 2020.
3. Albani VV, Loria J, Massad E, Zubelli JP. The impact of COVID-19 vaccination delay: A data-driven modeling analysis for Chicago and New York City. *Vaccine*. 2021;39(41):6088-94.
4. Awad SF, Musuka G, Mukandavire Z, Froass D, MacKinnon NJ, Cuadros DF. Implementation of a vaccination program based on epidemic geospatial attributes: Covid-19 pandemic in ohio as a case study and proof of concept. *Vaccines*. 2021;9(11):1242.
5. Bartsch SM, O'Shea KJ, Wedlock PT, Strych U, Ferguson MC, Bottazzi ME, et al. The benefits of vaccinating with the first available COVID-19 coronavirus vaccine. *American journal of preventive medicine*. 2021;60(5):605-13.
6. Bartsch SM, Wedlock PT, O'Shea KJ, Cox SN, Strych U, Nuzzo JB, et al. Lives and costs saved by expanding and expediting coronavirus disease 2019 vaccination. *The Journal of Infectious Diseases*. 2021;224(6):938-48.
7. Bilinski A, Salomon JA, Giardina J, Ciaranello A, Fitzpatrick MC. Passing the Test: A Model-Based Analysis of Safe School-Reopening Strategies. *Annals of internal medicine*. 2021;174(8):1090-100.
8. Brown RA. A simple model for control of COVID-19 infections on an urban campus. *Proceedings of the National Academy of Sciences of the United States of America*. 2021;118(36):e2105292118.
9. Bubar KM, Reinholt K, Kissler SM, Lipsitch M, Cobey S, Grad YH, et al. Model-informed COVID-19 vaccine prioritization strategies by age and serostatus. *Science*. 2021;371(6352):916-21.
10. Buckner JH, Chowell G, Springborn MR. Dynamic prioritization of COVID-19 vaccines when social distancing is limited for essential workers. *Proceedings of the National Academy of Sciences*. 2021;118(16):e2025786118.
11. Bushman M, Kahn R, Taylor BP, Lipsitch M, Hanage WP. Population impact of SARS-CoV-2 variants with enhanced transmissibility and/or partial immune escape. *Cell*. 2021;184(26):6229-42. e18.
12. Chaturvedi D, Chakravarty U. Predictive analysis of COVID-19 eradication with vaccination in India, Brazil, and USA. *Infection, Genetics and Evolution*. 2021;92:104834.
13. Chen X, Zhu G, Zhang L, Fang Y, Guo L, Chen X. Age-stratified COVID-19 spread analysis and vaccination: A multitype random network approach. *IEEE Transactions on Network Science and Engineering*. 2021;8(2):1862-72.
14. Fujimoto AB, Keskinocak P, Yildirim I. Significance of SARS-CoV-2 specific antibody testing during COVID-19 vaccine allocation. *Vaccine*. 2021;39(35):5055-63.
15. Giardina J, Bilinski A, Fitzpatrick MC, Kendall EA, Linas BP, Salomon J, et al. Model-estimated relationship between elementary school-related SARS-CoV-2 transmission, mitigation interventions, and vaccination coverage across community incidence levels. *Medrxiv*. 2021.
16. Gumel AB, Iboi EA, Ngonghala CN, Ngwa GA. Toward achieving a vaccine-derived herd immunity threshold for COVID-19 in the US. *Frontiers in Public Health*. 2021;9:709369.

17. Hartnett GS, Parker E, Gulden TR, Vardavas R, Kravitz D. Modelling the impact of social distancing and targeted vaccination on the spread of COVID-19 through a real city-scale contact network. *Journal of Complex Networks*. 2021;9(6):cnab042.
18. Islam MR, Oraby T, McCombs A, Chowdhury MM, Al-Mamun M, Tyshenko MG, et al. Evaluation of the United States COVID-19 vaccine allocation strategy. *PLoS one*. 2021;16(11):e0259700.
19. Ke R, Romero-Severson E, Sanche S, Hengartner N. Estimating the reproductive number  $R_0$  of SARS-CoV-2 in the United States and eight European countries and implications for vaccination. *Journal of theoretical biology*. 2021;517:110621.
20. Li R, Li Y, Zou Z, Liu Y, Li X, Zhuang G, et al. Evaluating the Impact of SARS-CoV-2 Variants on the COVID-19 Epidemic and Social Restoration in the United States: A Mathematical Modelling Study. *Frontiers in Public Health*. 2021;9.
21. Li Y, Ge L, Zhou Y, Cao X, Zheng J. Toward the impact of non-pharmaceutical interventions and vaccination on the COVID-19 pandemic with time-dependent SEIR model. *Frontiers in Artificial Intelligence*. 2021;4:648579.
22. Lu M, Ishwaran H. Cure and death play a role in understanding dynamics for COVID-19: Data-driven competing risk compartmental models, with and without vaccination. *PLoS one*. 2021;16(7):e0254397.
23. MacIntyre CR, Costantino V, Chanmugam A. The use of face masks during vaccine roll-out in New York City and impact on epidemic control. *Vaccine*. 2021;39(42):6296-301.
24. Makhoul M, Chemaitelly H, Ayoub HH, Seedat S, Abu-Raddad LJ. Epidemiological differences in the impact of COVID-19 vaccination in the United States and China. *Vaccines*. 2021;9(3):223.
25. Matrajt L, Eaton J, Leung T, Dimitrov D, Schiffer JT, Swan DA, et al. Optimizing vaccine allocation for COVID-19 vaccines shows the potential role of single-dose vaccination. *Nature communications*. 2021;12(1):3449.
26. McGee RS, Homburger JR, Williams HE, Bergstrom CT, Zhou AY. Model-driven mitigation measures for reopening schools during the COVID-19 pandemic. *Proceedings of the National Academy of Sciences*. 2021;118(39):e2108909118.
27. Moghadas SM, Fitzpatrick MC, Shoukat A, Zhang K, Galvani AP. Simulated identification of silent COVID-19 infections among children and estimated future infection rates with vaccination. *JAMA network open*. 2021;4(4):e217097-e.
28. Moghadas SM, Vilches TN, Zhang K, Nourbakhsh S, Sah P, Fitzpatrick MC, et al. Evaluation of COVID-19 vaccination strategies with a delayed second dose. *PLoS biology*. 2021;19(4):e3001211.
29. Moghadas SM, Vilches TN, Zhang K, Wells CR, Shoukat A, Singer BH, et al. The impact of vaccination on coronavirus disease 2019 (COVID-19) outbreaks in the United States. *Clinical Infectious Diseases*. 2021;73(12):2257-64.
30. Motta FC, McGoff KA, Deckard A, Wolfe CR, Bonsignori M, Moody MA, et al., editors. Assessment of simulated surveillance testing and quarantine in a SARS-CoV-2-vaccinated population of students on a university campus. *JAMA Health Forum*; 2021: American Medical Association.
31. Paltiel AD, Schwartz JL. Assessing COVID-19 prevention strategies to permit the safe opening of residential colleges in fall 2021. *Annals of internal medicine*. 2021;174(11):1563-71.
32. Paltiel AD, Schwartz JL, Zheng A, Walensky RP. Clinical Outcomes Of A COVID-19 Vaccine: Implementation Over Efficacy: Study examines how definitions and thresholds of vaccine efficacy, coupled with different levels of implementation effectiveness and background epidemic severity, translate into outcomes. *Health Affairs*. 2021;40(1):42-52.
33. Patel MD, Rosenstrom E, Ivy JS, Mayorga ME, Keskinocak P, Boyce RM, et al. Association of simulated COVID-19 vaccination and nonpharmaceutical interventions with infections, hospitalizations, and mortality. *JAMA network open*. 2021;4(6):e2110782-e.

34. Ram V, Schaposnik LP. A modified age-structured SIR model for COVID-19 type viruses. *Scientific reports*. 2021;11(1):15194.
35. Rao IJ, Brandeau ML. Optimal allocation of limited vaccine to control an infectious disease: Simple analytical conditions. *Mathematical biosciences*. 2021;337:108621.
36. Romero-Brufau S, Chopra A, Ryu AJ, Gel E, Raskar R, Kremers W, et al. Public health impact of delaying second dose of BNT162b2 or mRNA-1273 covid-19 vaccine: simulation agent based modeling study. *bmj*. 2021;373.
37. Ryckman T, Chin ET, Prince L, Leidner D, Long E, Studdert DM, et al. Outbreaks of COVID-19 variants in US prisons: a mathematical modelling analysis of vaccination and reopening policies. *The Lancet Public Health*. 2021;6(10):e760-e70.
38. Shadabfar M, Mahsuli M, Khoojine AS, Hosseini VR. Time-variant reliability-based prediction of COVID-19 spread using extended SEIVR model and Monte Carlo sampling. *Results in Physics*. 2021;26:104364.
39. Shen M, Zu J, Fairley CK, Pagán JA, An L, Du Z, et al. Projected COVID-19 epidemic in the United States in the context of the effectiveness of a potential vaccine and implications for social distancing and face mask use. *Vaccine*. 2021;39(16):2295-302.
40. Stoddard M, Sarkar S, Yuan L, Nolan RP, White DE, White LF, et al. Beyond the new normal: Assessing the feasibility of vaccine-based suppression of SARS-CoV-2. *Plos one*. 2021;16(7):e0254734.
41. Storlie CB, Pollock BD, Rojas RL, Demuth GO, Johnson PW, Wilson PM, et al., editors. *Quantifying the importance of COVID-19 vaccination to our future outlook*. Mayo Clinic Proceedings; 2021: Elsevier.
42. Swan DA, Bracis C, Janes H, Moore M, Matrajt L, Reeves DB, et al. COVID-19 vaccines that reduce symptoms but do not block infection need higher coverage and faster rollout to achieve population impact. *Scientific reports*. 2021;11(1):15531.
43. Swan DA, Goyal A, Bracis C, Moore M, Krantz E, Brown E, et al. Mathematical modeling of vaccines that prevent SARS-CoV-2 transmission. *Viruses*. 2021;13(10):1921.
44. Tatapudi H, Das R, Das TK. Impact of vaccine prioritization strategies on mitigating COVID-19: an agent-based simulation study using an urban region in the United States. *BMC medical research methodology*. 2021;21(1):1-14.
45. Tran TN-A, Wikle NB, Albert E, Inam H, Strong E, Brinda K, et al. Optimal SARS-CoV-2 vaccine allocation using real-time attack-rate estimates in Rhode Island and Massachusetts. *BMC medicine*. 2021;19:1-14.
46. Truszkowska A, Behring B, Hasanyan J, Zino L, Butail S, Caroppo E, et al. High-Resolution Agent-Based Modeling of COVID-19 Spreading in a Small Town. *Adv Theory Simul*. 2021;4(3):2000277.
47. Webb G. A COVID-19 epidemic model predicting the effectiveness of vaccination in the US. *Infectious Disease Reports*. 2021;13(3):654-67.
48. Zhao X, Tatapudi H, Corey G, Gopalappa C. Threshold analyses on combinations of testing, population size, and vaccine coverage for COVID-19 control in a university setting. *Plos one*. 2021;16(8):e0255864.
49. Avila-Ponce de León U, Avila-Vales E, Huang K-I. Modeling the transmission of the SARS-CoV-2 delta variant in a partially vaccinated population. *Viruses*. 2022;14(1):158.
50. Belval EJ, Bayham J, Thompson MP, Dillio J, Buchwald AG. Modeling the systemic risks of COVID-19 on the wildland firefighting workforce. *Scientific Reports*. 2022;12(1):8320.
51. Bianchin G, Dall'Anese E, Poveda JI, Jacobson D, Carlton EJ, Buchwald AG. Novel use of online optimization in a mathematical model of COVID-19 to guide the relaxation of pandemic mitigation measures. *Scientific Reports*. 2022;12(1):4731.
52. Bilinski A, Ciaranello A, Fitzpatrick MC, Giardina J, Shah M, Salomon JA, et al. Estimated transmission outcomes and costs of SARS-CoV-2 diagnostic testing, screening, and surveillance strategies among a simulated population of primary school students. *JAMA pediatrics*. 2022;176(7):679-89.

53. Blumberg S, Lu P, Kwan AT, Hoover CM, Lloyd-Smith JO, Sears D, et al. Modeling scenarios for mitigating outbreaks in congregate settings. *PLoS computational biology*. 2022;18(7):e1010308.
54. Bracis C, Moore M, Swan DA, Matrajt L, Anderson L, Reeves DB, et al. Improving vaccination coverage and offering vaccine to all school-age children allowed uninterrupted in-person schooling in King County, WA: Modeling analysis. *Mathematical biosciences and engineering: MBE*. 2022;19(6):5699.
55. Chen L, Xu F, Han Z, Tang K, Hui P, Evans J, et al. Strategic COVID-19 vaccine distribution can simultaneously elevate social utility and equity. *Nature Human Behaviour*. 2022;6(11):1503-14.
56. Chen X, Huang H, Ju J, Sun R, Zhang J. Impact of vaccination on the COVID-19 pandemic in US states. *Scientific reports*. 2022;12(1):1554.
57. Chowdhury MM, Islam MR, Hossain MS, Tabassum N, Peace A. Incorporating the mutational landscape of SARS-CoV-2 variants and case-dependent vaccination rates into epidemic models. *Infectious Disease Modelling*. 2022;7(2):75.
58. Fosdick BK, Bayham J, Dillio J, Ebel GD, Ehrhart N. Model-based evaluation of policy impacts and the continued COVID-19 risk at long term care facilities. *Infectious Disease Modelling*. 2022;7(3):463-72.
59. Frazier PI, Cashore JM, Duan N, Henderson SG, Janmohamed A, Liu B, et al. Modeling for COVID-19 college reopening decisions: Cornell, a case study. *Proceedings of the National Academy of Sciences*. 2022;119(2):e2112532119.
60. Gavish N, Katriel G. The role of childrens' vaccination for COVID-19—Pareto-optimal allocations of vaccines. *PLoS Computational Biology*. 2022;18(2):e1009872.
61. Giardina J, Bilinski A, Fitzpatrick MC, Kendall EA, Linas BP, Salomon J, et al. Model-estimated association between simulated US elementary school–related SARS-CoV-2 transmission, mitigation interventions, and vaccine coverage across local incidence levels. *JAMA Network Open*. 2022;5(2):e2147827-e.
62. Gómez Vázquez JP, García YE, Schmidt AJ, Martínez-López B, Nuño M. Testing and vaccination to reduce the impact of COVID-19 in nursing homes: an agent-based approach. *BMC Infectious Diseases*. 2022;22(1):477.
63. Grabowski F, Kočańczyk M, Lipniacki T. The spread of SARS-CoV-2 variant Omicron with a doubling time of 2.0–3.3 days can be explained by immune evasion. *Viruses*. 2022;14(2):294.
64. Hachtel GD, Stack JD, Hachtel JA. Forecasting and modeling of the COVID-19 pandemic in the USA with a timed intervention model. *Scientific reports*. 2022;12(1):4339.
65. He D, Ali ST, Fan G, Gao D, Song H, Lou Y, et al. Evaluation of effectiveness of global COVID-19 vaccination campaign. *Emerging Infectious Diseases*. 2022;28(9):1873.
66. Head JR, Andrejko KL, Remais JV. Model-based assessment of SARS-CoV-2 Delta variant transmission dynamics within partially vaccinated K-12 school populations. *The Lancet Regional Health—Americas*. 2022;5.
67. Hekmati A, Luhar M, Krishnamachari B, Matarić M. Simulating COVID-19 classroom transmission on a university campus. *Proceedings of the National Academy of Sciences*. 2022;119(22):e2116165119.
68. Hupert N, Marín-Hernández D, Gao B, Águas R, Nixon DF. Heterologous vaccination interventions to reduce pandemic morbidity and mortality: Modeling the US winter 2020 COVID-19 wave. *Proceedings of the National Academy of Sciences*. 2022;119(3):e2025448119.
69. Jhun B, Choi H. Abrupt transition of the efficient vaccination strategy in a population with heterogeneous fatality rates. *Chaos: An Interdisciplinary Journal of Nonlinear Science*. 2022;32(9).
70. Junge M, Li S, Samaranayake S, Zalesak M. Safe reopening of university campuses is possible with COVID-19 vaccination. *Plos one*. 2022;17(7):e0270106.

71. Kadelka C, Islam MR, McCombs A, Alston J, Morton N. Ethnic homophily affects vaccine prioritization strategies. *Journal of Theoretical Biology*. 2022;555:111295.
72. Kim D, Keskinocak P, Pekkün P, Yildirim I. The balancing role of distribution speed against varying efficacy levels of COVID-19 vaccines under variants. *Scientific reports*. 2022;12(1):7493.
73. Kohli MA, Maschio M, Lee A, Fust K, Van de Velde N, Buck PO, et al. The potential clinical impact of implementing different COVID-19 boosters in fall 2022 in the United States. *Journal of Medical Economics*. 2022;25(1):1127-39.
74. Kumar CK, Balasubramanian R, Ongarello S, Carmona S, Laxminarayan R. SARS-CoV-2 testing strategies for outbreak mitigation in vaccinated populations. *Plos one*. 2022;17(7):e0271103.
75. Ledder G. Incorporating mass vaccination into compartment models for infectious diseases. *medRxiv*. 2022:2022.04.26.22274335.
76. Li M, Zu J, Zhang Y, Ma L, Shen M, Li Z, et al. COVID-19 epidemic in New York City: development of an age group-specific mathematical model to predict the outcome of various vaccination strategies. *Virology Journal*. 2022;19(1):1-13.
77. Li Q, Huang Y. Optimizing global COVID-19 vaccine allocation: An agent-based computational model of 148 countries. *PLoS computational biology*. 2022;18(9):e1010463.
78. Lin L, Zhao Y, Chen B, He D. Multiple COVID-19 waves and vaccination effectiveness in the United States. *International journal of environmental research and public health*. 2022;19(4):2282.
79. Liu X, Lv Z, Ding Y. Mathematical modeling and stability analysis of the time-delayed SAIM model for COVID-19 vaccination and media coverage. *Math Biosci Eng*. 2022;19(6):6296-316.
80. Mallela A, Neumann J, Miller EF, Chen Y, Posner RG, Lin YT, et al. Bayesian inference of state-level COVID-19 basic reproduction numbers across the United States. *Viruses*. 2022;14(1):157.
81. Pantha B, Mohammed-Awel J, Vaidya NK. EFFECTS OF VACCINATION ON THE TRANSMISSION DYNAMICS OF COVID-19 IN DOUGHERTY COUNTY OF GEORGIA, USA. *Journal of Biological Systems*. 2022;30(03):553-83.
82. Paris CF, Spencer JA, Castro LA, Del Valle SY. Exploring Impacts to COVID-19 Herd Immunity Thresholds Under Demographic Heterogeneity that Lowers Vaccine Effectiveness. *medRxiv*. 2022.
83. Piccirillo V. COVID-19 pandemic control using restrictions and vaccination. *Math Biosci Eng*. 2022;19:1355-72.
84. Rabil MJ, Tunc S, Bish DR, Bish EK. Benefits of integrated screening and vaccination for infection control. *Plos one*. 2022;17(4):e0267388.
85. Rabil MJ, Tunc S, Bish DR, Bish EK. Effective screening strategies for safe opening of universities under Omicron and Delta variants of COVID-19. *Scientific Reports*. 2022;12:21309.
86. Rao IJ, Brandeau ML. Sequential allocation of vaccine to control an infectious disease. *Mathematical Biosciences*. 2022;351:108879.
87. Safdar S, Ngonghala CN, Gumel AB. Mathematical assessment of the role of waning and boosting immunity against the BA. 1 Omicron variant in the United States. *medRxiv*. 2022:2022.07.21.22277903.
88. Singh BK, Walker J, Paul P, Reddy S, Gowler CD, Jernigan J, et al. De-escalation of asymptomatic testing and potential of future COVID-19 outbreaks in US nursing homes amidst rising community vaccination coverage: a modeling study. *Vaccine*. 2022;40(23):3165-73.
89. Taboe HB, Asare-Baah M, Iboi EA, Ngonghala CN. Quantifying the impact of vaccines and booster doses on COVID-19 in the US. *medRxiv*. 2022:2022.07.06.22277303.

90. Walker J, Paul P, Dooling K, Oliver S, Prasad P, Steele M, et al. Modeling strategies for the allocation of SARS-CoV-2 vaccines in the United States. *Vaccine*. 2022;40(14):2134-9.
91. Yang Q, Gruenbacher DM, Scoglio CM. Estimating data-driven coronavirus disease 2019 mitigation strategies for safe university reopening. *Journal of the Royal Society Interface*. 2022;19(188):20210920.
92. Ngonghala CN, Taboe HB, Safdar S, Gumel AB. Unraveling the dynamics of the Omicron and Delta variants of the 2019 coronavirus in the presence of vaccination, mask usage, and antiviral treatment. *Applied mathematical modelling*. 2023;114:447-65.

**B. List of excluded studies with reasons in this review (150 studies)**

| # | Study ID     | Title                                                                                                      | Journal                                           | Vol | Issue | Pages     | DOI                           | Exclusion reason                           |
|---|--------------|------------------------------------------------------------------------------------------------------------|---------------------------------------------------|-----|-------|-----------|-------------------------------|--------------------------------------------|
| 1 | Aguas 2021   | Potential global impacts of alternative dosing regimen and rollout options for the ChAdOx1 nCoV-19 vaccine | Nature communications                             | 12  | 1     | 6370      | 10.1038/s41467-021-26449-8    | Exclusion reason: Not US-based.            |
| 2 | Aguiar 2022  | The role of mild and asymptomatic infections on COVID-19 vaccines performance: A modeling study            | Journal of Advanced Research                      | 39  |       | 157-166   | 10.1016/j.jare.2021.10.012    | Exclusion reason: Not US-based.            |
| 3 | Ahmed 2021   | Numerical simulation and stability analysis of a novel reaction-diffusion COVID-19 model                   | Nonlinear Dynamics                                | 106 | 2     | 1293-1310 | 10.1007/s11071-021-06623-9    | Exclusion reason: Not US-based.            |
| 4 | Ahn 2022     | Reproduction Factor Based Latent Epidemic Model Inference: A Data-driven Approach Using COVID-19 Datasets  | IEEE Journal of Biomedical and Health Informatics | 27  | 3     | 1259-1270 | 10.1109/JBHI.2022.3213175     | Exclusion reason: NOT US STUDY             |
| 5 | Albani 2021  | COVID-19 underreporting and its impact on vaccination strategies                                           | BMC Infectious Diseases                           | 21  | 1     | 1111      | 10.1186/s12879-021-06780-7    | Exclusion reason: NOT US STUDY             |
| 6 | Ali 2020     | The role of asymptomatic class, quarantine and isolation in the transmission of COVID-19                   | Journal of Biological Dynamics                    | 14  | 1     | 389-408   | 10.1080/17513758.2020.1773000 | Exclusion reason: Vaccines not considered; |
| 7 | Angelov 2022 | Optimal vaccination strategies using a distributed model applied to COVID-19                               | Central European Journal of Operations Research   |     |       |           | 10.1007/s10100-022-00819-z    | Exclusion reason: Not US-based.            |



|    |                   |                                                                                                                                     |                                 |     |   |         |                             |                                                                        |
|----|-------------------|-------------------------------------------------------------------------------------------------------------------------------------|---------------------------------|-----|---|---------|-----------------------------|------------------------------------------------------------------------|
| 8  | Antonio 2022      | Effectiveness of COVID-19 Vaccines: Evidence from the First-Year Rollout of Vaccination Programs                                    | Vaccines                        | 10  | 3 | 409     | 10.3390/vaccines10030409    | Exclusion reason: Not an eligible model type (non-transmission model). |
| 9  | Antonopoulos 2022 | A generic model for pandemics in networks of communities and the role of vaccination                                                | Chaos                           | 32  | 6 | 63127   | 10.1063/5.0082002           | Exclusion reason: Not US-based.                                        |
| 10 | Arino 2022        | Bistability in deterministic and stochastic SLIAR-type models with imperfect and waning vaccine protection                          | Journal of Mathematical Biology | 84  | 7 | 61      | 10.1007/s00285-022-01765-9  | Exclusion reason: Not US-based.                                        |
| 11 | Ballesteros 2020  | Hamiltonian structure of compartmental epidemiological models                                                                       | Physica D                       | 413 |   | 132656  | 10.1016/j.physd.2020.132656 | Exclusion reason: Not US-based.                                        |
| 12 | Basu 2021         | Quality-Adjusted Life-Year Losses Averted With Every COVID-19 Infection Prevented in the United States                              | Value in Health                 | 24  | 5 | 632-640 | 10.1016/j.jval.2020.11.013  | Exclusion reason: NOT STUDY VACCINE/VACCINATION/VACCINE STRATEGY       |
| 13 | Batista 2020      | Minimizing disease spread on a quarantined cruise ship: A model of COVID-19 with asymptomatic infections                            | Mathematical Biosciences        | 329 |   | 108442  | 10.1016/j.mbs.2020.108442   | Exclusion reason: Vaccines not considered.                             |
| 14 | Bays 2021         | What effect might border screening have on preventing the importation of COVID-19 compared with other infections? A modelling study | Epidemiology and Infection      | 149 |   | e238    | 10.1017/S0950268821002387   | Exclusion reason: Vaccines not considered;                             |

|    |                |                                                                                                |                                                               |     |    |          |                              |                                                                                    |
|----|----------------|------------------------------------------------------------------------------------------------|---------------------------------------------------------------|-----|----|----------|------------------------------|------------------------------------------------------------------------------------|
| 15 | Bekiros 2020   | SBDiEM: A new mathematical model of infectious disease dynamics                                | Chaos Solitons & Fractals                                     | 136 |    | 109828   | 10.1016/j.chaos.2020.109828  | Exclusion reason: Wrong outcome assessed (e.g. mortality, healthcare utilization). |
| 16 | Bokharaie 2021 | A study on the effects of containment policies and vaccination on the spread of SARS-CoV-2     | PLoS ONE                                                      | 16  | 3  | e0247439 | 10.1371/journal.pone.0247439 | Exclusion reason: NOT US STUDY                                                     |
| 17 | Bottcher 2021  | Decisive conditions for strategic vaccination against SARS-CoV-2                               | Chaos                                                         | 31  | 10 | 101105   | 10.1063/5.0066992            | Exclusion reason: NOT US STUDY                                                     |
| 18 | Boujallal 2022 | Set-Valued Control to COVID-19 Spread with Treatment and Limitation of Vaccination Resources   | Iranian Journal of Science & Technology Transaction a Science | 46  | 3  | 829-838  | 10.1007/s40995-022-01295-5   | Exclusion reason: Not US-based.                                                    |
| 19 | Brabers 2022   | The spread of infectious diseases from a physics perspective                                   | medRxiv                                                       |     |    | 2022-06  | 10.1101/2022.06.01.22275842  | Exclusion reason: Wrong outcome assessed (e.g. mortality, healthcare utilization). |
| 20 | Brook 2021     | Optimizing COVID-19 control with asymptomatic surveillance testing in a university environment | Epidemics                                                     | 37  |    | 100527   | 10.1016/j.epidem.2021.100527 | Exclusion reason: Not US-based.                                                    |

|    |                        |                                                                                                                     |                                   |     |   |              |                                 |                                                                            |
|----|------------------------|---------------------------------------------------------------------------------------------------------------------|-----------------------------------|-----|---|--------------|---------------------------------|----------------------------------------------------------------------------|
| 21 | Carlsson 2021          | A note on variable susceptibility, the herd-immunity threshold and modeling of infectious diseases                  | Plos one                          | 18  | 2 | e0279<br>454 | 10.1101/2021.07.08.21260175     | Exclusion reason:<br>Not US-based.                                         |
| 22 | Chattopadhyay 2021     | Infection kinetics of Covid-19 and containment strategy                                                             | Scientific Reports                | 11  | 1 | 11606        | 10.1038/s41598-021-90698-2      | Exclusion reason:<br>Vaccines not considered.                              |
| 23 | Chen 2022              | Measurement of contagion spatial spread probability in public places: A case study on COVID-19                      | Applied Geography                 | 143 |   | 10270<br>0   | 10.1016/j.apgeog.2022.102700    | Exclusion reason:<br>Not US-based.                                         |
| 24 | Ciunkiewicz 2022       | Agent-based epidemiological modeling of COVID-19 in localized environments                                          | Computers in Biology and Medicine | 144 |   | 10539<br>6   | 10.1016/j.combiomed.2022.105396 | Exclusion reason:<br>Not US-based.                                         |
| 25 | Dagpunar 2021          | A prototype vaccination model for endemic Covid-19 under waning immunity and imperfect vaccine take-up              | medRxiv                           |     |   | 2021-<br>11  | 10.1101/2021.11.06.21266002     | Exclusion reason:<br>Not US-based.                                         |
| 26 | Dai 2022               | Global prediction model for COVID-19 pandemic with the characteristics of the multiple peaks and local fluctuations | BMC Medical Research Methodology  | 22  | 1 | 4-Jan        | 10.1186/s12874-022-01604-x      | Exclusion reason:<br>Vaccines not considered.                              |
| 27 | de Miguel-Arribas 2022 | Impact of vaccine hesitancy on secondary COVID-19 outbreaks in the US: an age-structured SIR model                  | BMC Infectious Diseases           | 22  | 1 | 12-Jan       | 10.1186/s12879-022-07486-0      | Exclusion reason:<br>NOT STUDY<br>VACCINE/VACCINATION/VACCINATION STRATEGY |

|    |                       |                                                                                                                                                         |                                           |     |     |           |                              |                                                                  |
|----|-----------------------|---------------------------------------------------------------------------------------------------------------------------------------------------------|-------------------------------------------|-----|-----|-----------|------------------------------|------------------------------------------------------------------|
| 28 | Di Giamberardino 2021 | A data-driven model of the COVID-19 spread among interconnected populations: epidemiological and mobility aspects following the lockdown in Italy       | Nonlinear Dynamics                        | 106 | 2   | 1239-1266 | 10.1007/s11071-021-06840-2   | Exclusion reason: Not US-based.                                  |
| 29 | Dogra 2022            | Mathematical modeling identifies optimal dosing schedules for COVID-19 vaccines to minimize breakthrough infections                                     | medRxiv                                   |     |     |           | 10.1101/2022.09.14.22279959  | Exclusion reason: NOT US STUDY                                   |
| 30 | Engelbrecht 2021      | Test for Covid-19 seasonality and the risk of second waves                                                                                              | One Health                                | 12  |     | 100202    | 10.1016/j.onehlt.2020.100202 | Exclusion reason: Vaccines not considered.                       |
| 31 | España 2022           | Prioritizing interventions for preventing COVID-19 outbreaks in military basic training                                                                 | PLoS Computational Biology                | 18  | 10  | e1010489  | 10.1371/journal.pcbi.1010489 | Exclusion reason: NOT STUDY VACCINE/VACCINATION/VACCINE STRATEGY |
| 32 | Faucher 2022          | Agent-based modelling of reactive vaccination of workplaces and schools against COVID-19                                                                | Nature communications                     | 13  | 1   | 1414      | 10.1038/s41467-022-29015-y   | Exclusion reason: Not US-based.                                  |
| 33 | Favero 2022           | Modelling preventive measures and their effect on generation times in emerging epidemics                                                                | Journal of the Royal Society Interface    | 19  | 191 | 20220128  | 10.1098/rsif.2022.0128       | Exclusion reason: Not US-based.                                  |
| 34 | Fisman 2022           | Impact of population mixing between vaccinated and unvaccinated subpopulations on infectious disease dynamics: implications for SARS-CoV-2 transmission | CMAJ Canadian Medical Association Journal | 194 | 16  | E573-E580 | 10.1503/cmaj.212105          | Exclusion reason: Not US-based.                                  |

|    |               |                                                                                                                                                     |                                        |    |     |          |                             |                                                                                    |
|----|---------------|-----------------------------------------------------------------------------------------------------------------------------------------------------|----------------------------------------|----|-----|----------|-----------------------------|------------------------------------------------------------------------------------|
| 35 | Flahault 2003 | [SARS-CoV: 2. Modeling SARS epidemic]                                                                                                               | Medecine Sciences: M/S                 | 19 | 11  | 1161-4   | 10.1051/medsci/200319111161 | Exclusion reason: Non-English.                                                     |
| 36 | Forde 2021    | Modeling the Influence of Vaccine Administration on COVID-19 Testing Strategies                                                                     | Viruses                                | 13 | 12  | 19       | 10.3390/v13122546           | Exclusion reason: Wrong outcome assessed (e.g. mortality, healthcare utilization). |
| 37 | Gandolfi 2022 | A new threshold reveals the uncertainty about the effect of school opening on diffusion of Covid-19                                                 | Scientific Reports                     | 12 | 1   | 3012     | 10.1038/s41598-022-06540-w  | Exclusion reason: Not US-based.                                                    |
| 38 | Gaudou 2020   | COMOKIT: A Modeling Kit to Understand, Analyze, and Compare the Impacts of Mitigation Policies Against the COVID-19 Epidemic at the Scale of a City | Frontiers in Public Health             | 8  |     | 563247   | 10.3389/fpubh.2020.563247   | Exclusion reason: Not US-based.                                                    |
| 39 | Geoffroy 2022 | Vaccination strategies when vaccines are scarce: on conflicts between reducing the burden and avoiding the evolution of escape mutants              | Journal of the Royal Society Interface | 19 | 191 | 20220045 | 10.1098/rsif.2022.0045      | Exclusion reason: NOT US STUDY                                                     |

|    |                  |                                                                                                                                                                                                  |                                                  |     |    |              |                              |                                                                           |
|----|------------------|--------------------------------------------------------------------------------------------------------------------------------------------------------------------------------------------------|--------------------------------------------------|-----|----|--------------|------------------------------|---------------------------------------------------------------------------|
| 40 | Glasser 2022     | Analysis of Serological Surveys of Antibodies to SARS-CoV-2 in the United States to Estimate Parameters Needed for Transmission Modeling and to Evaluate and Improve the Accuracy of Predictions | Journal of Theoretical Biology                   | 556 |    | 11129<br>6   | 10.1016/j.jtbi.2022.111296   | Exclusion reason:<br>NOT STUDY<br>VACCINE/VACCINATION/VACCINE STRATEGY    |
| 41 | Goh 2022         | A country-specific model of COVID-19 vaccination coverage needed for herd immunity in adult only or population wide vaccination programme                                                        | Epidemics                                        | 39  |    | 10058<br>1   | 10.1016/j.epidem.2022.100581 | Exclusion reason:<br>Not US-based.                                        |
| 42 | Goldenbogen 2022 | Control of COVID-19 Outbreaks under Stochastic Community Dynamics, Bimodality, or Limited Vaccination                                                                                            | Advanced science                                 | 9   | 23 | e2200<br>088 | 10.1002/advs.202200088       | Exclusion reason:<br>Not US-based.                                        |
| 43 | Good 2020        | The Interaction of Natural and Vaccine-Induced Immunity with Social Distancing Predicts the Evolution of the COVID-19 Pandemic                                                                   | mBio                                             | 11  | 5  | 23           | 10.1128/mBio.02617-20        | Exclusion reason:<br>Not US-based.                                        |
| 44 | Hanly 2022       | Modelling vaccination capacity at mass vaccination hubs and general practice clinics: a simulation study                                                                                         | BMC Health Services Research                     | 22  | 1  | 11-Jan       | 10.1186/s12913-022-08447-8   | Exclusion reason:<br>Not an eligible model type (non-transmission model). |
| 45 | Hassan 2021      | Mathematical Modeling and Covid-19 Forecast in Texas, USA: a prediction model analysis and the probability of disease outbreak                                                                   | Disaster Medicine and Public Health Preparedness | 17  |    | e19          | 10.1017/dmp.2021.151         | Exclusion reason:<br>Vaccines not considered.                             |

|    |                      |                                                                                                                                                                                               |                                              |     |    |           |                               |                                            |
|----|----------------------|-----------------------------------------------------------------------------------------------------------------------------------------------------------------------------------------------|----------------------------------------------|-----|----|-----------|-------------------------------|--------------------------------------------|
| 46 | Head 2021            | Model-based assessment of SARS-CoV-2 Delta variant transmission dynamics within partially vaccinated K-12 school populations                                                                  | MedRxiv                                      |     |    |           | 10.1101/2021.08.20.21262389   | Exclusion reason: DUPLICATED STUDIES       |
| 47 | Herrera-Serrano 2022 | An efficient nonstandard computer method to solve a compartmental epidemiological model for COVID-19 with vaccination and population migration                                                | Computer Methods and Programs in Biomedicine | 221 |    | 106920    | 10.1016/j.cmpb.2022.106920    | Exclusion reason: Not US-based.            |
| 48 | Hickey 2022          | Compartmental mixing models for vaccination-status-based segregation regarding viral respiratory diseases                                                                                     | medRxiv                                      |     |    | 2022-08   | 10.1101/2022.08.21.22279035   | Exclusion reason: Not US-based             |
| 49 | Higgins 2022         | [A structural method to assess the course of the SARS-CoV-2 pandemic in school environmentsMetodo estructural para examinar el curso de la pandemia por el SARS-CoV-2 en ambientes escolares] | Pan American Journal of Public Health        | 46  |    | e117      | 10.26633/RPSP.2022.117        | Exclusion reason: Non-English.             |
| 50 | Hirata 2020          | Topological epidemic model: Theoretical insight into underlying networks                                                                                                                      | Chaos                                        | 30  | 10 | 101103    | 10.1063/5.0023796             | Exclusion reason: Vaccines not considered. |
| 51 | Hogan 2021           | Within-country age-based prioritisation, global allocation, and public health impact of a vaccine against SARS-CoV-2: A mathematical modelling analysis                                       | Vaccine                                      | 39  | 22 | 2995-3006 | 10.1016/j.vaccine.2021.04.002 | Exclusion reason: NOT US STUDY             |

|    |                  |                                                                                                                          |                                                                 |    |    |         |                             |                                            |
|----|------------------|--------------------------------------------------------------------------------------------------------------------------|-----------------------------------------------------------------|----|----|---------|-----------------------------|--------------------------------------------|
| 52 | Hohenegger 2022  | Effective mathematical modelling of health passes during a pandemic                                                      | Scientific Reports                                              | 12 | 1  | 6989    | 10.1038/s41598-022-10663-5  | Exclusion reason: Not US-based.            |
| 53 | Horvat 2022      | An extended SIR model with vaccine dynamics for SARS-CoV-2 adaptation rate                                               | medRxiv                                                         |    |    | 2022-02 | 10.1101/2022.02.11.22270784 | Exclusion reason: Not US-based             |
| 54 | Huang 2021       | Modeling of the Long-Term Epidemic Dynamics of COVID-19 in the United States                                             | International Journal of Environmental Research & Public Health | 18 | 14 | 16      | 10.3390/ijerph18147594      | Exclusion reason: Vaccines not considered. |
| 55 | Humphrey 2021    | Large-scale frequent testing and tracing to supplement control of Covid-19 and vaccination rollout constrained by supply | Infectious Disease Modelling                                    | 6  |    | 955-974 | 10.1016/j.idm.2021.06.008   | Exclusion reason: Not US-based.            |
| 56 | Huntingford 2021 | Optimal COVID-19 Vaccine Sharing Between Two Nations That Also Have Extensive Travel Exchanges                           | Frontiers in Public Health                                      | 9  |    | 633144  | 10.3389/fpubh.2021.633144   | Exclusion reason: Not US-based.            |
| 57 | Ilyin 2021       | A Recursive Model of the Spread of COVID-19: Modelling Study                                                             | JMIR Public Health and Surveillance                             | 7  | 4  | e21468  | 10.2196/21468               | Exclusion reason: Vaccines not considered. |
| 58 | Jitsuk 2022      | Vaccination strategies impact the probability of outbreak extinction: a case study of COVID-19 transmission              | medRxiv                                                         |    |    | 2022-07 | 10.1101/2022.07.23.22277952 | Exclusion reason: Not US-based             |
| 59 | Joshi 2022       | Comparative performance of between-population vaccine allocation strategies with applications to SARS-CoV-2              | MedRxiv                                                         |    |    | 2021-06 | 10.1101/2021.06.18.21259137 | Exclusion reason: NOT US STUDY             |



|    |                 |                                                                                                                                                       |                                                                 |    |    |          |                              |                                            |
|----|-----------------|-------------------------------------------------------------------------------------------------------------------------------------------------------|-----------------------------------------------------------------|----|----|----------|------------------------------|--------------------------------------------|
| 60 | Kadelka 2021    | Effect of homophily and correlation of beliefs on COVID-19 and general infectious disease outbreaks                                                   | PLoS ONE                                                        | 16 | 12 | e0260973 | 10.1371/journal.pone.0260973 | Exclusion reason: NOT US STUDY             |
| 61 | Kastalskiy 2021 | Social stress drives the multi-wave dynamics of COVID-19 outbreaks                                                                                    | Scientific Reports                                              | 11 | 1  | 22497    | 10.1038/s41598-021-01317-z   | Exclusion reason: Vaccines not considered. |
| 62 | Khan 2021       | Effect of high and low risk susceptibles in the transmission dynamics of COVID-19 and control strategies                                              | PLoS ONE                                                        | 16 | 9  | e0257354 | 10.1371/journal.pone.0257354 | Exclusion reason: NOT US STUDY             |
| 63 | Khan 2022       | Correlated stochastic epidemic model for the dynamics of SARS-CoV-2 with vaccination                                                                  | Scientific Reports                                              | 12 | 1  | 16105    | 10.1038/s41598-022-20059-0   | Exclusion reason: Not US-based.            |
| 64 | Kheifetz 2022   | On the Parametrization of Epidemiologic Models-Lessons from Modelling COVID-19 Epidemic                                                               | Viruses                                                         | 14 | 7  | 1468     | 10.3390/v14071468            | Exclusion reason: Not US-based.            |
| 65 | Kheirallah 2020 | The Effect of Strict State Measures on the Epidemiologic Curve of COVID-19 Infection in the Context of a Developing Country: A Simulation from Jordan | International Journal of Environmental Research & Public Health | 17 | 18 | 6530     | 10.3390/ijerph17186530       | Exclusion reason: Not US-based;            |
| 66 | Krueger 2022    | Risk assessment of COVID-19 epidemic resurgence in relation to SARS-CoV-2 variants and vaccination passes                                             | Communication medicale                                          | 2  |    | 23       | 10.1038/s43856-022-00084-w   | Exclusion reason: Not US-based.            |

|    |               |                                                                                                                                                |                                                                 |     |               |          |                              |                                            |
|----|---------------|------------------------------------------------------------------------------------------------------------------------------------------------|-----------------------------------------------------------------|-----|---------------|----------|------------------------------|--------------------------------------------|
| 67 | Kumar 2021    | Social media effectiveness as a humanitarian response to mitigate influenza epidemic and COVID-19 pandemic                                     | Annals of Operations Research                                   | 319 | 1             | 823-51   | 10.1007/s10479-021-03955-y   | Exclusion reason: Vaccines not considered. |
| 68 | Kumar 2021    | Activity-based epidemic propagation and contact network scaling in auto-dependent metropolitan areas                                           | Scientific Reports                                              | 11  | 1             | 22665    | 10.1038/s41598-021-01522-w   | Exclusion reason: Vaccines not considered. |
| 69 | Le Rutte 2021 | The potential impact of Omicron and future variants of concern on SARS-CoV-2 transmission dynamics and public health burden: a modelling study | medRxiv                                                         |     |               | 2021-12  | 10.1101/2021.12.12.21267673  | Exclusion reason: Not US-based.            |
| 70 | Lebkiri 2020  | Impact of containment type on covid-19 propagation in morocco using the sir model                                                              | Bangladesh Journal of Medical Science                           | 19  | Special issue | S58-S65  | 10.3329/bjms.v19i0.48167     | Exclusion reason: Not US-based.            |
| 71 | Lee 2021      | Analysis of Superspreading Potential from Transmission Clusters of COVID-19 in South Korea                                                     | International Journal of Environmental Research & Public Health | 18  | 24            | 7        | 10.3390/ijerph182412893      | Exclusion reason: Not US-based;            |
| 72 | Lee 2021      | The value of decreasing the duration of the infectious period of severe acute respiratory syndrome coronavirus 2 (SARS-CoV-2) infection        | PLoS Computational Biology                                      | 17  | 1             | e1008470 | 10.1371/journal.pcbi.1008470 | Exclusion reason: Vaccines not considered. |

|    |                  |                                                                                                                                             |                                                                   |     |   |           |                              |                                                                  |
|----|------------------|---------------------------------------------------------------------------------------------------------------------------------------------|-------------------------------------------------------------------|-----|---|-----------|------------------------------|------------------------------------------------------------------|
| 73 | Lee 2022         | Epidemic Vulnerability Index for Effective Vaccine Distribution against Pandemic                                                            | IEEE/ACM Transactions on Computational Biology and Bioinformatics |     |   |           | 10.1109/TCBB.2022.3198365    | Exclusion reason: NOT STUDY VACCINE/VACCINATION/VACCINE STRATEGY |
| 74 | LeRutte 2022     | Modelling the impact of Omicron and emerging variants on SARS-CoV-2 transmission and public health burden                                   | Communication medicale                                            | 2   |   | 93        | 10.1038/s43856-022-00154-z   | Exclusion reason: Not US-based.                                  |
| 75 | Lin 2022         | Vaccination strategy for preventing the spread of SARS-CoV-2 in the limited supply condition: A mathematical modeling study                 | Journal of Medical Virology                                       | 94  | 8 | 3722-3730 | 10.1002/jmv.27783            | Exclusion reason: NOT US STUDY                                   |
| 76 | LuisaVissat 2022 | A comparison of COVID-19 outbreaks across US Combined Statistical Areas using new methods for estimating R0 and social distancing behaviour | UC Berkeley. Report #: 100640.                                    |     |   |           | 10.1016/j.epidem.2022.100640 | Exclusion reason: Vaccines not considered.                       |
| 77 | Makhoul 2020     | Epidemiological Impact of SARS-CoV-2 Vaccination: Mathematical Modeling Analyses                                                            | Vaccines                                                          | 8   | 4 | 668       | 10.3390/vaccines8040668      | Exclusion reason: Not US-based.                                  |
| 78 | Marinov 2022     | Adaptive SIR model with vaccination: simultaneous identification of rates and functions illustrated with COVID-19                           | Scientific Reports                                                | 12  | 1 | 15688     | 10.1038/s41598-022-20276-7   | Exclusion reason: NOT STUDY VACCINE/VACCINATION/VACCINE STRATEGY |
| 79 | Marzouk 2022     | SARS-CoV-2 transmission in opposition-controlled Northwest Syria: modeling pandemic responses during political conflict                     | International Journal of Infectious Diseases                      | 117 |   | 103-115   | 10.1016/j.ijid.2022.01.062   | Exclusion reason: Not US-based.                                  |

|    |               |                                                                                                                                                          |                                        |     |      |          |                              |                                                                  |
|----|---------------|----------------------------------------------------------------------------------------------------------------------------------------------------------|----------------------------------------|-----|------|----------|------------------------------|------------------------------------------------------------------|
| 80 | Mokhtari 2021 | A multi-method approach to modeling COVID-19 disease dynamics in the United States                                                                       | Scientific Reports                     | 11  | 1    | 12426    | 10.1038/s41598-021-92000-w   | Exclusion reason: Vaccines not considered.                       |
| 81 | Molla 2022    | Adaptive and optimized COVID-19 vaccination strategies across geographical regions and age groups                                                        | PLoS Computational Biology             | 18  | 4    | e1009974 | 10.1371/journal.pcbi.1009974 | Exclusion reason: Not US-based.                                  |
| 82 | Monod 2021    | Age groups that sustain resurging COVID-19 epidemics in the United States                                                                                | Science                                | 371 | 6536 | eabe8372 | 10.1126/science.abe8372      | Exclusion reason: Vaccines not considered                        |
| 83 | Nashebi 2022  | Using a real-world network to model the tradeoff between stay-at-home restriction, vaccination, social distancing and working hours on COVID-19 dynamics | Peer J                                 | 10  |      | e14353   | 10.1101/2022.04.15.22273449  | Exclusion reason: Not US-based                                   |
| 84 | Newcomb 2021  | Combining predictive models with future change scenarios can produce credible forecasts of COVID-19 futures                                              | PLoS One                               | 17  | 11   | e0277521 | 10.1101/2021.12.14.21267804  | Exclusion reason: Vaccines not considered.                       |
| 85 | O'Dea 2022    | A semi-parametric, state-space compartmental model with time-dependent parameters for forecasting COVID-19 cases, hospitalizations and deaths            | Journal of the Royal Society Interface | 19  | 187  | 20210702 | 10.1098/rsif.2021.0702       | Exclusion reason: NOT STUDY VACCINE/VACCINATION/VACCINE STRATEGY |
| 86 | Olivares 2021 | Uncertainty quantification of a mathematical model of COVID-19 transmission dynamics with mass vaccination strategy                                      | Chaos Solitons & Fractals              | 146 |      | 110895   | 10.1016/j.chaos.2021.110895  | Exclusion reason: Not US-based.                                  |

|    |                      |                                                                                                                                    |                                                   |     |     |          |                                 |                                                                  |
|----|----------------------|------------------------------------------------------------------------------------------------------------------------------------|---------------------------------------------------|-----|-----|----------|---------------------------------|------------------------------------------------------------------|
| 87 | Omame 2023           | Global asymptotic stability, extinction and ergodic stationary distribution in a stochastic model for dual variants of SARS-CoV-2  | Mathematics & Computers in Simulation             | 204 |     | 302-336  | 10.1016/j.matcom.2022.08.012    | Exclusion reason: Not US-based.                                  |
| 88 | Otunuga 2022         | Analysis of multi-strain infection of vaccinated and recovered population through epidemic model: Application to COVID-19          | PLoS ONE                                          | 17  | 7   | e0271446 | 10.1371/journal.pone.0271446    | Exclusion reason: NOT STUDY VACCINE/VACCINATION/VACCINE STRATEGY |
| 89 | Palomo-Briones 2022  | An agent-based model of the dual causality between individual and collective behaviors in an epidemic                              | Computers in Biology and Medicine                 | 141 |     | 104995   | 10.1016/j.compbimed.2021.104995 | Exclusion reason: Vaccines not considered.                       |
| 90 | Park 2022            | The importance of the generation interval in investigating dynamics and control of new SARS-CoV-2 variants                         | Journal of the Royal Society Interface            | 19  | 191 | 20220173 | 10.1098/rsif.2022.0173          | Exclusion reason: Not US-based.                                  |
| 91 | Pastor-Satorras 2022 | The advantage of self-protecting interventions in mitigating epidemic circulation at the community level                           | Scientific Reports                                | 12  | 1   | 15950    | 10.1038/s41598-022-20152-4      | Exclusion reason: Vaccines not considered.                       |
| 92 | Penn 2022            | Optimality of Maximal-Effort Vaccination                                                                                           | Bulletin of Mathematical Biology                  | 85  | 8   | 73       | 10.1101/2022.05.12.22275015     | Exclusion reason: Not US-based                                   |
| 93 | Phan 2022            | A simple SEIR-V model to estimate COVID-19 prevalence and predict SARS-CoV-2 transmission using wastewater-based surveillance data | MedRxiv : the Preprint Server for Health Sciences | 18  |     | 18       | 10.1101/2022.07.17.22277721     | Exclusion reason: Vaccines not considered.                       |

|     |                       |                                                                                                                                                                 |                                                    |     |    |          |                                 |                                                 |
|-----|-----------------------|-----------------------------------------------------------------------------------------------------------------------------------------------------------------|----------------------------------------------------|-----|----|----------|---------------------------------|-------------------------------------------------|
| 94  | Plank 2022            | Minimising the use of costly control measures in an epidemic elimination strategy: A simple mathematical model                                                  | Mathematical Biosciences                           | 351 |    | 108885   | 10.1016/j.mbs.2022.108885       | Exclusion reason: Vaccines not considered.      |
| 95  | Pung 2022             | Using high-resolution contact networks to evaluate SARS-CoV-2 transmission and control in large-scale multi-day events                                          | Nature communications                              | 13  | 1  | 1956     | 10.1038/s41467-022-29522-y      | Exclusion reason: Not US-based.                 |
| 96  | Rao 2021              | Optimal allocation of limited vaccine to minimize the effective reproduction number                                                                             | Mathematical Biosciences                           | 339 |    | 108654   | 10.1016/j.mbs.2021.108654       | Exclusion reason: NOT ARTICLE TYPES OF INTEREST |
| 97  | Reguly 2022           | Microsimulation based quantitative analysis of COVID-19 management strategies                                                                                   | PLoS Computational Biology                         | 18  | 1  | e1009693 | 10.1371/journal.pcbi.1009693    | Exclusion reason: Not US-based.                 |
| 98  | Robinson 2022         | Comprehensive compartmental model and calibration algorithm for the study of clinical implications of the population-level spread of COVID-19: a study protocol | BMJ Open                                           | 12  | 3  | e052681  | 10.1136/bmjopen-2021-052681     | Exclusion reason: Not US-based.                 |
| 99  | Rochman 2021          | Evolution of human respiratory virus epidemics                                                                                                                  | F1000Research                                      | 10  |    | 447      | 10.12688/f1000research.53392.2  | Exclusion reason: Vaccines not considered.      |
| 100 | Rodríguez 2022        | An agent-based transmission model of COVID-19 for re-opening policy design                                                                                      | Computers in Biology and Medicine                  | 148 |    | 105847   | 10.1016/j.combiomed.2022.105847 | Exclusion reason: Not US-based.                 |
| 101 | Rodriguez-Maroto 2021 | Vaccination strategies in structured populations under partial immunity and reinfection                                                                         | Journal of Physics A: Mathematical and Theoretical | 56  | 20 | 204003   | 10.1101/2021.11.23.21266766     | Exclusion reason: NOT US STUDY                  |

|     |                   |                                                                                                                      |                                       |     |      |         |                                 |                                            |
|-----|-------------------|----------------------------------------------------------------------------------------------------------------------|---------------------------------------|-----|------|---------|---------------------------------|--------------------------------------------|
| 102 | Saad-Roy 2020     | Immune life history, vaccination, and the dynamics of SARS-CoV-2 over the next 5 years                               | Science                               | 370 | 6518 | 811-818 | 10.1126/science.abd7343         | Exclusion reason: Not US-based.            |
| 103 | Saad-Roy 2021     | Epidemiological and evolutionary considerations of SARS-CoV-2 vaccine dosing regimes                                 | Science                               | 372 | 6540 | 363-370 | 10.1126/science.abg8663         | Exclusion reason: NOT US STUDY             |
| 104 | Saad-Roy 2021     | Vaccine breakthrough and the invasion dynamics of SARS-CoV-2 variants                                                | medRxiv                               |     |      |         | 10.1101/2021.12.13.21267725     | Exclusion reason: NOT US STUDY             |
| 105 | Sachak-Patwa 2021 | The risk of SARS-CoV-2 outbreaks in low prevalence settings following the removal of travel restrictions             | Communication medicale                | 1   |      | 39      | 10.1038/s43856-021-00038-8      | Exclusion reason: Not US-based;            |
| 106 | Safranek 2022     | A computer modeling method to analyze rideshare data for the surveillance of novel strains of SARS-CoV-2             | Annals of Epidemiology                | 76  |      | 136-42  | 10.1016/j.annepidem.2022.08.051 | Exclusion reason: Vaccines not considered. |
| 107 | Saha 2022         | Impact of optimal vaccination and social distancing on COVID-19 pandemic                                             | Mathematics & Computers in Simulation | 200 |      | 285-314 | 10.1016/j.matcom.2022.04.025    | Exclusion reason: Not US-based.            |
| 108 | Saha 2022         | Effect of awareness, quarantine and vaccination as control strategies on COVID-19 with Co-morbidity and Re-infection | Infectious Disease Modelling          | 7   | 4    | 660-689 | 10.1016/j.idm.2022.09.004       | Exclusion reason: NOT US STUDY             |
| 109 | Saldana 2022      | Influence of heterogeneous age-group contact patterns on critical vaccination rates for herd immunity to SARS-CoV-2  | Scientific Reports                    | 12  | 1    | 2640    | 10.1038/s41598-022-06477-0      | Exclusion reason: Not US-based.            |

|     |                  |                                                                                                                                                                       |                                                         |     |   |         |                             |                                 |
|-----|------------------|-----------------------------------------------------------------------------------------------------------------------------------------------------------------------|---------------------------------------------------------|-----|---|---------|-----------------------------|---------------------------------|
| 110 | Santra 2022      | Mathematical Analysis of Two Waves of COVID-19 Disease with Impact of Vaccination as Optimal Control                                                                  | Computational and Mathematical Methods in Medicine      |     |   |         | 10.1155/2022/2684055        | Exclusion reason: Not US-based. |
| 111 | Sararat 2022     | Community vaccination can shorten the COVID-19 isolation period: an individual-based modeling approach                                                                | medRxiv                                                 |     |   |         | 10.1101/2022.02.08.22270668 | Exclusion reason: NOT US STUDY  |
| 112 | Sararat 2022     | Individual-based modeling reveals that the COVID-19 isolation period can be shortened by community vaccination                                                        | Scientific Reports                                      | 12  | 1 | 17543   | 10.1038/s41598-022-21645-y  | Exclusion reason: NOT US STUDY  |
| 113 | Schulenburg 2022 | Effects of infection fatality ratio and social contact matrices on vaccine prioritization strategies                                                                  | Chaos                                                   | 32  | 9 |         | 10.1063/5.0096532           | Exclusion reason: Not US-based. |
| 114 | Schuppert 2022   | [Intensive care bed requirements for COVID-19 in the fall/winter of 2021 : Simulation of different scenarios under consideration of incidences and vaccination rates] | Medizinische Klinik, Intensivmedizin Und Notfallmedizin | 117 | 6 | 439-446 | 10.1007/s00063-021-00862-9  | Exclusion reason: Non-English.  |
| 115 | Scutt 2022       | Theoretically quantifying the direct and indirect benefits of vaccination against SARS-CoV-2 in terms of avoided deaths                                               | Scientific Reports                                      | 12  | 1 | 8833    | 10.1038/s41598-022-12591-w  | Exclusion reason: Not US-based. |



|     |                    |                                                                                                                                                      |                                                                                 |     |    |           |                              |                                            |
|-----|--------------------|------------------------------------------------------------------------------------------------------------------------------------------------------|---------------------------------------------------------------------------------|-----|----|-----------|------------------------------|--------------------------------------------|
| 116 | ShamsiGamchi 2022  | A novel mathematical model for prioritization of individuals to receive vaccine considering governmental health protocols                            | European Journal of Health Economics                                            | 24  | 4  | 633-646   | 10.1007/s10198-022-01491-5   | Exclusion reason: Not US-based.            |
| 117 | Shivam 2022        | Vaccine Stockpile Sharing For Selfish Objectives                                                                                                     | PLOS global public health                                                       | 2   | 12 | e0001312  | 10.1371/journal.pgph.0001312 | Exclusion reason: Not US-based             |
| 118 | Silva 2021         | Optimized delay of the second COVID-19 vaccine dose reduces ICU admissions                                                                           | Proceedings of the National Academy of Sciences of the United States of America | 118 | 35 | 31        | 10.1073/pnas.2104640118      | Exclusion reason: Not US-based.            |
| 119 | Singh 2022         | COVID-19 outbreak: a predictive mathematical study incorporating shedding effect                                                                     | Journal of Applied Mathematics & Computing International Journal                | 69  | 1  | 1239-1268 | 10.1007/s12190-022-01792-1   | Exclusion reason: Vaccines not considered. |
| 120 | SoutoFerreira 2022 | Assessing the best time interval between doses in a two-dose vaccination regimen to reduce the number of deaths in an ongoing epidemic of SARS-CoV-2 | PLoS Computational Biology                                                      | 18  | 3  | e1009978  | 10.1371/journal.pcbi.1009978 | Exclusion reason: Not US-based.            |
| 121 | Stevenson 2021     | Modelling of hypothetical sars-cov-2 point of care tests for routine testing in residential care homes: Rapid cost-effectiveness analysis            | Health Technology Assessment                                                    | 25  | 39 | vi-73     | 10.3310/hta25390             | Exclusion reason: NOT US STUDY             |

|     |                    |                                                                                                                                                                                        |                                          |     |    |         |                            |                                                                  |
|-----|--------------------|----------------------------------------------------------------------------------------------------------------------------------------------------------------------------------------|------------------------------------------|-----|----|---------|----------------------------|------------------------------------------------------------------|
| 122 | Stoddard 2021      | Individually optimal choices can be collectively disastrous in COVID-19 disease control                                                                                                | BMC Public Health                        | 21  | 1  | 832     | 10.1186/s12889-021-10829-2 | Exclusion reason: Vaccines not considered.                       |
| 123 | Tang 2022          | The minimal COVID-19 vaccination coverage and efficacy to compensate for a potential increase of transmission contacts, and increased transmission probability of the emerging strains | BMC Public Health                        | 22  | 1  | 1258    | 10.1186/s12889-022-13429-w | Exclusion reason: Not US-based.                                  |
| 124 | Tang 2022          | Controlling Multiple COVID-19 Epidemic Waves: An Insight from a Multi-scale Model Linking the Behaviour Change Dynamics to the Disease Transmission Dynamics                           | Bulletin of Mathematical Biology         | 84  | 10 | 106     | 10.1007/s11538-022-01061-z | Exclusion reason: NOT STUDY VACCINE/VACCINATION/VACCINE STRATEGY |
| 125 | Toxvaerd 2022      | On the management of population immunity                                                                                                                                               | Journal of Economic Theory               | 204 |    | 105501  | 10.1016/j.jet.2022.105501  | Exclusion reason: Not US-based.                                  |
| 126 | Treesatayapun 2022 | Epidemic model dynamics and fuzzy neural-network optimal control with impulsive traveling and migrating: Case study of COVID-19 vaccination                                            | Biomedical Signal Processing and Control | 71  |    | 103227  | 10.1016/j.bspc.2021.103227 | Exclusion reason: Not US-based.                                  |
| 127 | Truszkowska 2021   | Designing the Safe Reopening of US Towns Through High-Resolution Agent-Based Modeling                                                                                                  | Advanced Theory and Simulations          | 4   | 9  | 2100157 | 10.1002/adts.202100157     | Exclusion reason: DUPLICATED STUDIES                             |

|     |                  |                                                                                                                         |                                                                 |     |      |           |                                    |                                                                                         |
|-----|------------------|-------------------------------------------------------------------------------------------------------------------------|-----------------------------------------------------------------|-----|------|-----------|------------------------------------|-----------------------------------------------------------------------------------------|
| 128 | Truszkowska 2022 | Predicting the Effects of Waning Vaccine Immunity Against COVID-19 through High-Resolution Agent-Based Modeling         | Advanced Theory and Simulations                                 | 5   | 6    | 2100521   | 10.1002/adts.202100521             | Exclusion reason: NOT STUDY VACCINE/VACCINATION/VACCINE STRATEGY                        |
| 129 | Vakil 2022       | Projecting the Pandemic Trajectory through Modeling the Transmission Dynamics of COVID-19                               | International Journal of Environmental Research & Public Health | 19  | 8    | 4541      | 10.3390/ijerph19084541             | Exclusion reason: NOT US STUDY                                                          |
| 130 | Valles 2022      | Networks of necessity: Simulating COVID-19 mitigation strategies for disabled people and their caregivers               | PLoS Computational Biology                                      | 18  | 5    | e1010042  | 10.1371/journal.pcbi.1010042       | Exclusion reason: Not US-based.                                                         |
| 131 | vanderVegt 2022  | Learning transmission dynamics modelling of COVID-19 using comomodels                                                   | Mathematical Biosciences                                        | 349 |      | 108824    | 10.1016/j.mbs.2022.108824          | Exclusion reason: Not US-based.                                                         |
| 132 | Vilches 2022     | Estimating COVID-19 Infections, Hospitalizations, and Deaths Following the US Vaccination Campaigns During the Pandemic | JAMA Network Open                                               | 5   | 1    | e2142725  | 10.1001/jamanetworkopen.2021.42725 | Exclusion reason: Incorrect article type (e.g., commentary, review, editorial, letter). |
| 133 | Wagner 2021      | Vaccine nationalism and the dynamics and control of SARS-CoV-2                                                          | Science                                                         | 373 | 6562 | eabj7364  | 10.1126/science.abj7364            | Exclusion reason: Not US-based.                                                         |
| 134 | Wang 2021        | Effects of COVID-19 Vaccination Timing and Risk Prioritization on Mortality Rates, United States                        | Emerging Infectious Diseases                                    | 27  | 7    | 1976-1979 | 10.3201/eid2707.210118             | Exclusion reason: NOT ARTICLE TYPES OF INTEREST                                         |

|     |             |                                                                                                       |                                             |     |   |           |                               |                                                                                    |
|-----|-------------|-------------------------------------------------------------------------------------------------------|---------------------------------------------|-----|---|-----------|-------------------------------|------------------------------------------------------------------------------------|
| 135 | Wang 2022   | SARS-CoV-2 transmissibility compared between variants of concern and vaccination status               | Briefings in Bioinformatics                 | 23  | 2 | bbab594   | 10.1093/bib/bbab594           | Exclusion reason: Not an eligible model type (non-transmission model).             |
| 136 | Wang 2022   | Mathematical modeling of mutated COVID-19 transmission with quarantine, isolation and vaccination     | Mathematical Biosciences & Engineering: MBE | 19  | 8 | 8035-8056 | 10.3934/mbe.2022376           | Exclusion reason: Not US-based.                                                    |
| 137 | Wang 2022   | From Policy to Prediction: Forecasting COVID-19 Dynamics Under Imperfect Vaccination                  | Bulletin of Mathematical Biology            | 84  | 9 | 90        | 10.1007/s11538-022-01047-x    | Exclusion reason: NOT STUDY VACCINE/VACCINATION/VACCINE STRATEGY                   |
| 138 | Watson 2022 | Global impact of the first year of COVID-19 vaccination: a mathematical modelling study               | The Lancet Infectious Diseases              | 22  | 9 | 1293-1302 | 10.1016/S1473-3099(22)00320-6 | Exclusion reason: Wrong outcome assessed (e.g. mortality, healthcare utilization). |
| 139 | Weston 2022 | Targeting Equity in COVID-19 Vaccinations Using the "Evaluating Vulnerability and Equity" (EVE) Model | American Journal of Public Health           | 112 | 2 | 220-222   | 10.2105/AJPH.2021.306585      | Exclusion reason: Not an eligible model type (non-transmission model).             |

|     |               |                                                                                                                                                                              |                                                    |     |    |            |                               |                                                                         |
|-----|---------------|------------------------------------------------------------------------------------------------------------------------------------------------------------------------------|----------------------------------------------------|-----|----|------------|-------------------------------|-------------------------------------------------------------------------|
| 140 | Williams 2022 | Measuring Vaccine Efficacy Against Infection and Disease in Clinical Trials: Sources and Magnitude of Bias in Coronavirus Disease 2019 (COVID-19) Vaccine Efficacy Estimates | Clinical Infectious Diseases                       | 75  | 1  | e764-e773  | 10.1093/cid/ciab914           | Exclusion reason: NOT US STUDY                                          |
| 141 | Wolff 2020    | On build-up of epidemiologic models-Development of a SEI3RSD model for the spread of SARS-CoV-2                                                                              | Zeitschrift fur Angewandte Mathematik und Mechanik | 100 | 11 | e202000230 | 10.1002/zamm.202000230        | Exclusion reason: Not US-based.                                         |
| 142 | Xue 2022      | Infectivity versus fatality of SARS-CoV-2 mutations and influenza                                                                                                            | International Journal of Infectious Diseases       | 121 |    | 195-202    | 10.1016/j.ijid.2022.05.031    | Exclusion reason: NOT STUDY<br>VACCINE/VACCINATION/VACCINATION STRATEGY |
| 143 | Yang 2021     | Development of a model-inference system for estimating epidemiological characteristics of SARS-CoV-2 variants of concern                                                     | Nature communications                              | 12  | 1  | 5573       | 10.1038/s41467-021-25913-9    | Exclusion reason: NOT US STUDY                                          |
| 144 | Yang 2022     | Comparison of health-oriented cross-regional allocation strategies for the COVID-19 vaccine: a mathematical modelling study                                                  | Annals of Medicine                                 | 54  | 1  | 941-952    | 10.1080/07853890.2022.2060522 | Exclusion reason: NOT US STUDY                                          |

|     |            |                                                                                                                                                           |                                                                         |      |    |           |                              |                                                                  |
|-----|------------|-----------------------------------------------------------------------------------------------------------------------------------------------------------|-------------------------------------------------------------------------|------|----|-----------|------------------------------|------------------------------------------------------------------|
| 145 | Yu 2022    | Assessing the Impact of Continuous Vaccination and Voluntary Isolation on the Dynamics of COVID-19: A Mathematical Optimal Control of SEIR Epidemic Model | Computational Intelligence and Neuroscience                             | 2022 |    |           | 10.1155/2022/3309420         | Exclusion reason: Not US-based.                                  |
| 146 | Zhang 2021 | An integrated framework for building trustworthy data-driven epidemiological models: Application to the COVID-19 outbreak in New York City                | PLoS Computational Biology                                              | 17   | 9  | e1009334  | 10.1371/journal.pcbi.1009334 | Exclusion reason: NOT STUDY VACCINE/VACCINATION/VACCINE STRATEGY |
| 147 | Zhao 2021  | The impact of awareness diffusion on the spread of COVID-19 based on a two-layer SEIR/V-UA epidemic model                                                 | Journal of Medical Virology                                             | 93   | 7  | 4342-4350 | 10.1002/jmv.26945            | Exclusion reason: Not US-based.                                  |
| 148 | Zheng 2022 | How Seasonality and Control Measures Jointly Determine the Multistage Waves of the COVID-19 Epidemic: A Modelling Study and Implications                  | International Journal of Environmental Research & Public Health         | 19   | 11 | 6404      | 10.3390/ijerph19116404       | Exclusion reason: Vaccines not considered.                       |
| 149 | Zhu 2022   | Real-World COVID-19 Vaccine Protection Rates against Infection in the Delta and Omicron Eras                                                              | Research                                                                | 6    |    | 99        | 10.1101/2022.09.01.22279492  | Exclusion reason: NOT US STUDY                                   |
| 150 | Zong 2022  | Optimal control analysis of a multigroup SEIHRD model for COVID-19 epidemic                                                                               | Risk analysis: an official publication of the Society for Risk Analysis | 43   | 1  | 62-77     | 10.1111/risa.14027           | Exclusion reason: NOT US STUDY                                   |



**Supplementary Table 1: General characteristics of included studies**

|               | Aim/Purpose                                                                                                                                                                                                                                         | Model               | Population         | Intervention       | Key findings                                                                                                                                                                                                                                                                                                                                                                                                                                                                                                                                                                                                                                                                                                              | Number of factors incorporated into model | Factors incorporated into model |
|---------------|-----------------------------------------------------------------------------------------------------------------------------------------------------------------------------------------------------------------------------------------------------|---------------------|--------------------|--------------------|---------------------------------------------------------------------------------------------------------------------------------------------------------------------------------------------------------------------------------------------------------------------------------------------------------------------------------------------------------------------------------------------------------------------------------------------------------------------------------------------------------------------------------------------------------------------------------------------------------------------------------------------------------------------------------------------------------------------------|-------------------------------------------|---------------------------------|
| Bartsch, 2020 | The team developed a computational model of the U.S. simulating the spread of COVID-19 coronavirus and vaccination.                                                                                                                                 | Compartmental model | General population | Vaccine strategies | This study found that the vaccine has to have an efficacy of at least 70% to prevent an epidemic and of at least 80% to largely extinguish an epidemic without any other measures (e.g., social distancing).                                                                                                                                                                                                                                                                                                                                                                                                                                                                                                              | 1                                         | Age                             |
| Matrajt, 2020 | This study used an age-stratified mathematical model paired with optimization algorithms to determine the optimal use of the vaccine for four different metrics: deaths, symptomatic infections, and maximum non-ICU and ICU hospitalizations       | Compartmental model | General population | Vaccine strategies | A vaccine with effectiveness =50% would be enough to mitigate the ongoing COVID-19 pandemic substantially, provided that a high percentage of the population is optimally vaccinated.<br>When minimizing deaths, for low vaccine effectiveness, irrespective of vaccination coverage, it is optimal to allocate vaccine to high-risk (older) age groups first. In contrast, for higher vaccine effectiveness, there is a switch to allocate vaccine to high-transmission (younger) age groups first for high vaccination coverage.                                                                                                                                                                                        | 1                                         | Age                             |
| Albani, 2021  | To analyze the impact of delaying COVID-19 vaccination on mortality, hospitalization, and recovery projections in Chicago and New York City                                                                                                         | Compartmental model | General population | Vaccine strategies | Delaying the vaccination campaign severely affects mortality, hospitalization, and recovery projections.                                                                                                                                                                                                                                                                                                                                                                                                                                                                                                                                                                                                                  | 0                                         |                                 |
| Awad, 2021    | This study used an innovative spatiotemporal model to assess the impact of vaccination distribution strategies based on disease geospatial attributes and population-level risk assessment.                                                         | Compartmental model | General population | Vaccine strategies | The results suggest that a vaccine program that distributes vaccines equally across the entire state effectively averts infections and hospitalizations (2954 and 165 cases, respectively). However, in a context with equitable vaccine allocation, the number of COVID-19 cases in high infection intensity areas will remain high; the cumulative number of cases remained >30,000 cases.                                                                                                                                                                                                                                                                                                                              | 1                                         | Geographical location           |
| Bartsch, 2021 | To estimate the clinical and economic value of vaccines with different possible efficacies (to prevent infection or to reduce severe disease) and vaccination timings                                                                               | Compartmental model | General population | Vaccine strategies | This study shows that there are relatively few situations in which it is worth foregoing the first COVID-19 vaccine available in favor of a vaccine that becomes available later on in the pandemic, even if the latter vaccine has a substantially higher efficacy.<br>For example, if a vaccine with a 50% efficacy in preventing infection becomes available when 10% of the population has already been infected, waiting until 40% of the population is infected for a vaccine with 80% efficacy in preventing infection resulting in 15.6 million additional cases and 1.5 million additional hospitalizations, costing \$20.6 billion more in direct medical costs and \$12.4 billion more in productivity losses. | 1                                         | Age                             |
| Bartsch, 2021 | To quantify the potential value of increasing COVID-19 vaccination coverage levels and expediting the vaccination process in the United States population. The authors developed a computational model to determine the impact of these measures on | Compartmental model | General population | Vaccine strategies | When achieving a given vaccination coverage in 270 days (70% vaccine efficacy), every 1% increase in coverage can avert an average of 876 800 (217 000–2 398 000) cases, varying with the number of people already vaccinated.<br>Expediting to 180 days could save an additional 5.8 million cases, 215 790 hospitalizations, 26 370 deaths, 206 520 QALYs, \$3.5 billion in direct medical costs, and \$4.3 billion in productivity losses.                                                                                                                                                                                                                                                                             | 1                                         | Age                             |



|                  |                                                                                                                                                                                                                                                                                                                                                                                                |                     |                       |                          |                                                                                                                                                                                                                                                                                                                                                                                 |   |                 |
|------------------|------------------------------------------------------------------------------------------------------------------------------------------------------------------------------------------------------------------------------------------------------------------------------------------------------------------------------------------------------------------------------------------------|---------------------|-----------------------|--------------------------|---------------------------------------------------------------------------------------------------------------------------------------------------------------------------------------------------------------------------------------------------------------------------------------------------------------------------------------------------------------------------------|---|-----------------|
|                  | epidemiologic, clinical, and economic outcomes                                                                                                                                                                                                                                                                                                                                                 |                     |                       |                          |                                                                                                                                                                                                                                                                                                                                                                                 |   |                 |
| Bilinski, 2021   | To assess the risk for SARS-CoV-2 transmission in schools and the effects of mitigation strategies on school reopening                                                                                                                                                                                                                                                                         | Agent-based model   | School population     | Vaccine strategies       | They found a small effect of teacher vaccination on overall transmission but a substantial effect on transmission to teachers. Specifically, teacher vaccination reduced secondary infections over 30 days to 91% and 97% of the average without vaccination in elementary and high schools, respectively.                                                                      | 0 |                 |
| Brown, 2021      | To assess control of the asymptomatic spread of COVID-19 infections in a residential, urban college campus embedded in a large urban community by using public health protocols, founded on surveillance testing, contact tracing, isolation, and quarantine .The analysis is expanded to include the effects of a partially effective vaccine in a partially vaccinated university community. | Compartmental model | University population | Vaccine strategies       | The positivity rate was ~0.2% for the Boston University testing program in fall 2020 and has decreased substantially as vaccinations have become available.                                                                                                                                                                                                                     | 0 |                 |
| Bubar, 2021      | To quantify the impact of COVID-19 vaccine prioritization strategies on cumulative incidence, mortality and years of life lost                                                                                                                                                                                                                                                                 | Compartmental model | General population    | Vaccine strategies       | Vaccinating adults aged 60 years or older minimized mortality for all levels of vaccine supply when transmission was high. However, the ranking of strategies varied across countries and scenarios                                                                                                                                                                             | 1 | Age             |
| Buckner, 2021    | To assess the optimal allocation of limited COVID-19 vaccine supply in the United States across sociodemographic groups differentiated by age and essential worker status                                                                                                                                                                                                                      | Compartmental model | General population    | Vaccine strategies       | The authors investigate three policy objectives: minimizing infections, years of life lost (YLL), or deaths. They find that the optimal policy is dynamic, with specific groups targeted each period, and these targets shift over time.                                                                                                                                        | 2 | Age, Occupation |
| Bushman, 2021    | To simulate the emergence and spread of different variants during the epidemic phase in populations that are controlling transmission through nonpharmaceutical interventions and vaccination                                                                                                                                                                                                  | Compartmental model | General population    | Vaccine strategies       | Variants with enhanced transmissibility invade easily in susceptible populations, while variants with partial immune escape do not; the latter can sometimes produce a second wave of infections, but these primarily occur in recovered and vaccinated individuals, who typically experience mild disease.                                                                     | 0 |                 |
| Chaturvedi, 2021 | To predict the possible timescales for the end of the epidemic for different values of vaccination rates                                                                                                                                                                                                                                                                                       | Compartmental model | General population    | Vaccine strategies       | COVID-19 is under control in all three countries as the expected effective reproduction term ( $R_t$ ) is less than 1.<br>USA needs even higher value of $V_s$ to get control over COVID-19 due to its highest number of active cases and an approach of dynamic disease control with relaxation rather than inhibitive disease eradication approach.                           | 0 |                 |
| Chen, 2021       | To study how to reduce hospitalizations and mortality from COVID-19 using age-stratified modeling                                                                                                                                                                                                                                                                                              | Compartmental model | General population    | Vaccine strategies       | The outcome of vaccination prioritization depends on the reproduction number $R_0$ . If $R_0$ is relatively high, the elderly should be prioritized. However, if ongoing intervention policies can suppress $R_0$ at a relatively low level, prioritizing the high-transmission age group (adults aged 20-39) is most effective in reducing both mortality and hospitalizations | 1 | Age             |
| Chowdhury, 2021  | to model scenarios by varying the overall population adoption of non-pharmaceutical interventions (NPIs) in                                                                                                                                                                                                                                                                                    | Compartmental model | General population    | Vaccine strategies, NPIs | The simulations show that if a large number of individuals cannot be vaccinated by ensuring high efficacy in a short period of time, adopting NPIs is the best approach to                                                                                                                                                                                                      | 0 |                 |

|                |                                                                                                                                                                                                           |                     |                    |                    |                                                                                                                                                                                                                                                                                                                                                                                                                                                                                                                                                                                             |   |                                                  |
|----------------|-----------------------------------------------------------------------------------------------------------------------------------------------------------------------------------------------------------|---------------------|--------------------|--------------------|---------------------------------------------------------------------------------------------------------------------------------------------------------------------------------------------------------------------------------------------------------------------------------------------------------------------------------------------------------------------------------------------------------------------------------------------------------------------------------------------------------------------------------------------------------------------------------------------|---|--------------------------------------------------|
|                | conjunction with vaccine efficacy, antibody waning, and change in prevalence of the co-circulating variants of the coronavirus over time                                                                  |                     |                    |                    | manage disease transmission with the emergence of new vaccine breakthrough and more infectious variants.                                                                                                                                                                                                                                                                                                                                                                                                                                                                                    |   |                                                  |
| Fujimoto, 2021 | To assess the value of using SARS-CoV-2 specific antibody testing to prioritize the vaccination of susceptible individuals as part of a COVID-19 vaccine distribution plan when vaccine supply is limited | Compartmental model | General population | Vaccine strategies | The use of antibody testing to prioritize the allocation of limited vaccines reduces infection attack rates and deaths. The size of the reduction depends on when the vaccine becomes available relative to the infection peak day. The largest percentage reduction in cases and deaths occurs when the vaccine is deployed before and close to the infection peak day. The reduction in the number of cases and deaths diminishes as vaccine deployment is delayed.                                                                                                                       | 0 |                                                  |
| Giardina, 2021 | To assess the relationship between elementary school-related SARS-CoV-2 transmission, mitigation interventions, and vaccination coverage across community incidence levels                                | Agent-based model   | School population  | Vaccine strategies | In one scenario with the delta variant and no student vaccination, assuming that baseline mitigation measures of simple ventilation and handwashing reduce the secondary attack rate by 40%, if decision-makers seek to keep the monthly probability of an in-school transmission below 50%, additional mitigation (e.g., masking) would need to be added at a community incidence of approximately 2/100,000/day. Mitigation measures or vaccinations for students can substantially reduce these risks, especially when implemented together.                                             | 0 |                                                  |
| Gumel, 2021    | To assess the population-level impact of these vaccines on curtailing the burden of COVID-19                                                                                                              | Compartmental model | General population | Vaccine strategies | A decrease in cumulative mortality is caused by increasing vaccination coverage. While a noticeable decrease in cumulative mortality is also observed when the vaccine coverage equals the herd immunity threshold, cumulative mortality dramatically increases if the vaccine coverage is below the herd immunity threshold.                                                                                                                                                                                                                                                               | 0 |                                                  |
| Hartnett, 2021 | To investigate how social distancing measures and the public's reaction to the incipient pandemic affected the connectivity patterns within the city using physician contact networks                     | Compartmental model | General population | Vaccine strategies | Regardless of social distancing, the targeted strategy far outperforms the uniform one and is able to suppress the epidemic when just a small fraction of the population has been vaccinated. The targeted vaccination strategy will always result in fewer infections than the uniform strategy, since it incorporates information about the person-to-person contact network.                                                                                                                                                                                                             | 0 |                                                  |
| Islam, 2021    | To directly evaluate the CDC recommendation by comparing it to all potentially optimal allocation strategies that stagger the vaccine roll-out in up to four phases (17.5 million strategies)             | Compartmental model | General population | Vaccine strategies | Under the developed model, the CDC allocation deviated from the optimal allocations by small amounts, with 0.19% more deaths, 4.0% more cases, 4.07% more infections, and 0.97% higher YLL, than the respective optimal strategies. Prioritizing the vaccination of the working age population generally led to fewer cases and infections at the expense of higher deaths and YLL, highlighting the anticipated trade-off in multi-objective decision making. A higher prioritization of individuals with comorbidities in all age groups improved outcomes compared to the CDC allocation | 4 | Age, Occupation, Comorbidities, Living condition |
| Ke, 2021       | To more accurately assess of early COVID-19 dynamics and explore how vaccination schedules depend on the value of R0 and the distribution of the duration of vaccine-induced immunity in a population     | Compartmental model | General population | Vaccine strategies | It is estimated that the median R0 value is 5.8 (confidence interval: 4.7–7.3) in the United States and between 3.6 and 6.1 in the eight European countries.                                                                                                                                                                                                                                                                                                                                                                                                                                | 0 |                                                  |
| Li, 2021       | To assess the impact of non-pharmaceutical interventions and vaccination on the COVID-19 pandemic with time-dependent SEIR model                                                                          | Compartmental model | General population | Vaccine strategies | Once vaccination begins, the growth of the immunity group V(t) and the decrease of the infected group I(t) clearly accelerate. The simulation of SEVIS model predicts that the pandemic will die down in fall 2021, assuming the mean vaccination rate to be 1% per day and the probability of gaining immunity after recovery to be 50%.                                                                                                                                                                                                                                                   | 0 |                                                  |

|                |                                                                                                                                                                                                                     |                     |                       |                          |                                                                                                                                                                                                                                                                                                                                                                                                                                                                                                                                 |   |                    |
|----------------|---------------------------------------------------------------------------------------------------------------------------------------------------------------------------------------------------------------------|---------------------|-----------------------|--------------------------|---------------------------------------------------------------------------------------------------------------------------------------------------------------------------------------------------------------------------------------------------------------------------------------------------------------------------------------------------------------------------------------------------------------------------------------------------------------------------------------------------------------------------------|---|--------------------|
| Li, 2021       | To evaluate the impact of vaccination scale-up and potential reduction in the vaccination effectiveness on the COVID-19 epidemic and social restoration in the US                                                   | Compartmental model | General population    | Vaccine strategies       | The overall existing vaccine effectiveness against the variant is 88.5% (95% CI: 87.4–89.5%) with the vaccination coverage of 70% by the end of August, 2021. With this vaccine effectiveness and coverage, there would be 498,972 (109,998–885,947) cumulative infections and 15,443 (3,828–27,057) deaths nationwide over the next 12 months, of which 95.0% infections and 93.3% deaths were caused by the variant.                                                                                                          | 0 |                    |
| Lu, 2021       | To identify and characterize 4 wave patterns and estimate the mortality rates, respectively                                                                                                                         | Compartmental model | General population    | Vaccine strategies       | Mortality rates for vaccinated individuals has been observed to be extremely low, therefore the death rate for this group was set to $M_{death} = .001\%$ . It shows a reduced wave after February 2021, which could be a potential fourth wave. Its value is reduced relative to the third contact rate wave due to the success of the vaccination.                                                                                                                                                                            | 0 |                    |
| Makhoul, 2021  | To assess the impact of novel vaccines on COVID-19 morbidity and mortality in two major countries at different epidemic phases                                                                                      | Compartmental model | General population    | Vaccine strategies       | For VEs of 95% and gradual easing of restrictions, vaccination in the US reduced the peak incidence of infection, disease, and death by >55% and cumulative incidence by >32% and in China by >77% and >65%, respectively. Nearly three vaccinations were needed to avert one infection in the US, but only one was needed in China. For VE <sub>p</sub> of 95%, vaccination benefits were half those for VES of 95%.                                                                                                           | 1 | Age                |
| Matrajt, 2021  | discuss the optimal allocation strategies for COVID-19 vaccines with one and two doses under different degrees of viral transmission.                                                                               | Compartmental model | General population    | Vaccine strategies       | With high single-dose efficacy, single-dose vaccination is optimal, preventing up to 22% more deaths than a strategy prioritizing two-dose vaccination for older adults. With low or moderate single-dose efficacy, mixed vaccination campaigns with complete coverage of older adults are optimal. However, with modest or high transmission, vaccinating older adults first with two doses is best, preventing up to 41% more deaths than a single-dose vaccination given across all adult populations.                       | 1 | Age                |
| McGee, 2021    | To explore the risks associated with returning to in-person learning and the value of mitigation measures including cohorting students, proactive testing, quarantine protocols, and vaccinating teachers and staff | Compartmental model | Schools population    | Vaccine strategies       | Teachers and staff who have been vaccinated against COVID-19 are well protected against infection. Vaccinating teachers can also reduce the risk of outbreaks among students, particularly when paired with cohorting. The combination of vaccinating teachers and cohorting students continues to substantially reduce the risk of outbreaks at higher levels of transmissibility, which suggests this strategy may offer a proactive defense against the spread of more transmissive variants.                                | 0 |                    |
| Moghadam, 2021 | To evaluate the impact of a 2-dose COVID-19 vaccination campaign on reducing incidence, hospitalizations, and deaths in the United States                                                                           | Agent-based model   | General population    | Vaccine strategies       | Vaccination reduced the overall attack rate to 4.6% from 9.0% without vaccination over 300 days, with the highest reduction observed among individuals aged 65 and older.                                                                                                                                                                                                                                                                                                                                                       | 2 | Age, Comorbidities |
| Moghadam, 2021 | To compare the epidemiological impact of tested and delayed second dose vaccination schedules, considering a range of preexisting immunity accrued since the emergence of COVID-19                                  | Agent-based model   | General population    | Vaccine strategies       | Delaying the second dose of Moderna vaccines by at least 9 weeks could maximize vaccination program effectiveness and avert additional infections, hospitalizations, and deaths per 10,000 population compared to the recommended 4-week interval between doses.                                                                                                                                                                                                                                                                | 1 | Age                |
| Moghadam, 2021 | To estimate the benefits of identifying silent infections among children as a proxy for their vaccination                                                                                                           | Compartmental model | Children              | Vaccine strategies       | In the base-case scenarios with an effective reproduction number $Re = 1.2$ , a targeted approach that identifies 11% of silent infections among children within 2 days and 14% within 3 days after infection would bring attack rates to less than 5% with 40% vaccination coverage of adults. If silent infections among children remained undetected, achieving the same attack rates would require an unrealistically high vaccination coverage (81%) of this age group, in addition to 40% vaccination coverage of adults. | 1 | Age                |
| Motta, 2021    | To evaluate the use of surveillance testing and quarantine in a fully vaccinated student population for                                                                                                             | Agent-based model   | University population | Vaccine strategies, NPIs | In simulations with 90% vaccine effectiveness, weekly surveillance testing was associated with only marginally reduced viral transmission. At 50% to 75% effectiveness, surveillance testing was estimated to reduce the number of infections by as much as 93.6%. A 10-day                                                                                                                                                                                                                                                     | 0 |                    |

|                      |                                                                                                                                                                                                                                                                                 |                     |                       |                    |                                                                                                                                                                                                                                                                                                                                                                                                                                                                                                                                                                                                                                                                                                                                                                                                                                                                   |   |                                                              |
|----------------------|---------------------------------------------------------------------------------------------------------------------------------------------------------------------------------------------------------------------------------------------------------------------------------|---------------------|-----------------------|--------------------|-------------------------------------------------------------------------------------------------------------------------------------------------------------------------------------------------------------------------------------------------------------------------------------------------------------------------------------------------------------------------------------------------------------------------------------------------------------------------------------------------------------------------------------------------------------------------------------------------------------------------------------------------------------------------------------------------------------------------------------------------------------------------------------------------------------------------------------------------------------------|---|--------------------------------------------------------------|
|                      | whom vaccine effectiveness may be affected by the type of vaccination, presence of variants, and loss of vaccine-induced or natural immunity over time                                                                                                                          |                     |                       |                    | quarantine protocol for exposures was associated with only a modest reduction in infections until vaccine effectiveness dropped to 50%. Increased testing of reported contacts was estimated to be at least as effective as quarantine at limiting infections.                                                                                                                                                                                                                                                                                                                                                                                                                                                                                                                                                                                                    |   |                                                              |
| Paltiel, 2021        | To examine how different definitions and thresholds of vaccine efficacy, coupled with different levels of implementation effectiveness and background epidemic severity                                                                                                         | Compartmental model | General population    | Vaccine strategies | Factors related to implementation will contribute more to the success of vaccination programs than the efficacy of a vaccine as determined in clinical trials. The benefits of a vaccine will decline substantially in the event of manufacturing or deployment delays, vaccine hesitancy, or greater epidemic severity.                                                                                                                                                                                                                                                                                                                                                                                                                                                                                                                                          | 0 |                                                              |
| Paltiel, 2021        | To help college administrators design and evaluate customized COVID-19 safety plans                                                                                                                                                                                             | Compartmental model | University population | Vaccine strategies | Under base-case assumptions, if 90% coverage can be attained with a vaccine that is 85% protective against infection and 25% protective against asymptomatic transmission, the model finds that campus activities can be resumed while holding cumulative cases below 5% of the population without the need for routine, asymptomatic testing. Colleges returning to pre-COVID-19 campus activities without either broad vaccination coverage or high-frequency testing put their campus population at risk for widespread viral transmission.                                                                                                                                                                                                                                                                                                                    | 0 |                                                              |
| Patel, 2021          | To assess the association of simulated COVID-19 vaccine efficacy and coverage scenarios with and without NPIs with infections, hospitalizations, and deaths.                                                                                                                    | Agent-based model   | General population    | Vaccine strategies | Higher vaccination coverage with less efficacious vaccines can contribute to a larger reduction in the risk of SARS-CoV-2 infection compared to more efficacious vaccines at lower coverage.                                                                                                                                                                                                                                                                                                                                                                                                                                                                                                                                                                                                                                                                      | 4 | Age, Race/Ethnicity, Living condition, Geographical location |
| RainaMacIntyre, 2021 | To examine the impact of face mask and other NPIs use with a gradual roll-out of vaccines in NYC on the epidemic trajectory                                                                                                                                                     | Compartmental model | General population    | Vaccine strategies | Vaccination alone taking 150 days to achieve target coverage would have decreased the cases (and deaths number) by 4.5% (23.6%), 13% (52.3%) and 20.5% (62.9%) respectively in the scenario where 20%, 50% and 70% of the population gets vaccinated over 150 days in the scenario with no NPIs used except case isolation and contact tracing. Vaccination when used in conjunction with social distancing, it makes a small difference, reducing cases (and deaths) by 1.3% (6.2%), 3.5% (14.5%) and 5.5% (19.2%) respectively for the three scenarios of 20%, 50% and 70% coverage over 150days. Finally, when vaccination is added to social distancing and masks, it further reduces cases only minimally, as in this scenario by the time the vaccination becomes effective, masks use and social distancing have already reduced transmission effectively. | 1 | Age                                                          |
| Ram, 2021            | To investigate the effect of a population's age distribution on the transmission and spread of COVID-19 including age-specific vaccine distribution (effect of prioritizing certain age-groups in vaccine distribution versus a homogeneous distribution across all age groups) | Compartmental model | General population    | Vaccine strategies | Vaccinations have a significant mitigating effect on the epidemic, with an average 28.2% reduction in mortality rate compared to without vaccinations. Prioritizing certain age groups in vaccine distribution can further enhance the effectiveness of vaccinations                                                                                                                                                                                                                                                                                                                                                                                                                                                                                                                                                                                              | 1 | Age                                                          |
| Rao, 2021            | to consider the optimal allocation of a limited supply of a preventive vaccine to control an infectious disease, and four different allocation objectives: minimize                                                                                                             | Compartmental model | General population    | Vaccine strategies | it is optimal to vaccinate younger individuals to minimize new infections, whereas it is optimal to vaccinate older individuals to minimize deaths, life years lost, or QALYs lost due to death.                                                                                                                                                                                                                                                                                                                                                                                                                                                                                                                                                                                                                                                                  | 2 | Age, Comorbidities                                           |

|                     |                                                                                                                                                                                                                                                        |                     |                                |                       |                                                                                                                                                                                                                                                                                                                                                                                                                                                                                                                                                                                                                                                              |    |                    |
|---------------------|--------------------------------------------------------------------------------------------------------------------------------------------------------------------------------------------------------------------------------------------------------|---------------------|--------------------------------|-----------------------|--------------------------------------------------------------------------------------------------------------------------------------------------------------------------------------------------------------------------------------------------------------------------------------------------------------------------------------------------------------------------------------------------------------------------------------------------------------------------------------------------------------------------------------------------------------------------------------------------------------------------------------------------------------|----|--------------------|
|                     | new infections, deaths, life years lost, or quality-adjusted life years (QALYs) lost due to death.                                                                                                                                                     |                     |                                |                       |                                                                                                                                                                                                                                                                                                                                                                                                                                                                                                                                                                                                                                                              |    |                    |
| Romero-Brufau, 2021 | To estimate population health outcomes with delayed second dose versus the standard schedule of SARS-CoV-2 mRNA vaccination                                                                                                                            | Agent-based model   | General population             | va Vaccine strategies | Over all simulation replications, the median cumulative mortality per 100 000 for standard dosing versus delayed second dose was 226 v 179, 233 v 207, and 235 v 236 for 90%, 80%, and 70% first dose efficacy, respectively. The delayed second dose strategy was optimal for vaccine efficacies at or above 80% and vaccination rates at or below 0.3% of the population per day, under both sterilizing and nonsterilizing vaccine assumptions, resulting in absolute cumulative mortality reductions between 26 and 47 per 100 000. The delayed second dose strategy for people under 65 performed consistently well under all vaccination rates tested. | 0  |                    |
| Ryckman, 2021       | To assess the impact of vaccination on COVID-19 in US prisons and to examine how three factors influence risks of outbreaks and severe outcomes: resumption of in-person activities, use of NPIs, and vaccination of individuals who are incarcerated. | Compartmental model | Congregate settings population | Vaccine strategies    | If a viral variant is introduced into a prison that has resumed pre-2020 contact levels, has moderate vaccine coverage (ranging from 36% to 76% among residents, dependent on age, with 40% coverage for staff), and has no baseline immunity, 23–74% of residents are expected to be infected over 200 days. High vaccination coverage (90%) coupled with NPIs reduces cumulative infections to 2–54%.                                                                                                                                                                                                                                                      | 5* | Age, Comorbidities |
| Shadabfar, 2021     | To predict the spreading profile of COVID-19 in the US via time-variant reliability analysis while accounting for prevailing uncertainties in the observed data                                                                                        | Compartmental model | General population             | Vaccine strategies    | The number of active cases decreases sharply by increasing the vaccination rate. For instance, quadrupling the vaccination rate reduces the number of active cases to less than 0.2 million by early 2022.                                                                                                                                                                                                                                                                                                                                                                                                                                                   | 0  |                    |
| Shen, 2021          | To evaluate the vaccine effectiveness and coverage required to suppress the COVID-19 epidemic in scenarios when social contact was to return to pre-pandemic levels and face mask use was reduced                                                      | Compartmental model | General population             | Vaccine strategies    | Without a vaccine, relaxing social distancing restrictions while maintaining current face mask use would lead to 0.8-4 million infections and 15,000-240,000 deaths across the four states within one year.<br>If face mask use rate decreased by 50%, a low vaccine effectiveness and coverage rate may not be enough to eliminate or suppress the pandemic without further major outbreaks.<br>Delaying vaccination rollout for 1-2 months would not substantially alter the epidemic trend if current nonpharmaceutical interventions are maintained                                                                                                      | 0  |                    |
| Stoddard, 2021      | To establish the link between vaccine characteristics and effectiveness and also to estimate the mortality burden of COVID-19 under endemic scenarios managed by partially-effective vaccination schemes using an epidemiological modeling framework   | Compartmental model | General population             | Vaccine strategies    | The modeling suggests that complete suppression of SARS-CoV-2 is feasible with high population-level compliance and highly effective vaccines in reducing infection.                                                                                                                                                                                                                                                                                                                                                                                                                                                                                         | 0  |                    |
| Storlie, 2021       | To assess the effects of the vaccination on the pandemic                                                                                                                                                                                               | Compartmental model | General population             | Vaccine strategies    | The model shows that if the population were 75% vaccinated right now, it would completely suppress the growth of COVID-19 cases and hospitalizations, driving them down to very low levels.                                                                                                                                                                                                                                                                                                                                                                                                                                                                  | 0  |                    |
| Swan, 2021          | To assess the effects of the vaccination on the pandemic                                                                                                                                                                                               | Compartmental model | General population             | Vaccine strategies    | The use of a "symptom reducing" vaccine will require twice as many people vaccinated than a "susceptibility reducing" vaccine with the same 90% VE DIS to prevent 50% of the infections and death over 1 year. Delaying the start of vaccination by 3 months decreases the expected population impact by more than 50%                                                                                                                                                                                                                                                                                                                                       | 1  | Age                |

|                          |                                                                                                                                                                                                                                                                     |                     |                                 |                          |                                                                                                                                                                                                                                                                                                                                                                                                                                                                |   |                                        |
|--------------------------|---------------------------------------------------------------------------------------------------------------------------------------------------------------------------------------------------------------------------------------------------------------------|---------------------|---------------------------------|--------------------------|----------------------------------------------------------------------------------------------------------------------------------------------------------------------------------------------------------------------------------------------------------------------------------------------------------------------------------------------------------------------------------------------------------------------------------------------------------------|---|----------------------------------------|
| Swan, 2021               | to demonstrate the potential effects of VEINF (vaccine efficacy against transmissibility given infection) at the population level given multiple vaccine profiles                                                                                                   | Compartmental model | General population              | Vaccine strategies       | The paper shows that if the Moderna and Pfizer-BioNTech vaccines, which demonstrated VE DIS > 90% in clinical trials, mediate VE DIS by VE SUSC, then a limited fourth epidemic wave of infections with the highly infectious B.1.1.7 variant would have been predicted in spring 2021 assuming rapid vaccine roll out.                                                                                                                                        | 1 | Age                                    |
| Tatapudi, 2021           | To assess the impact of vaccine prioritization strategies on mitigating COVID-19                                                                                                                                                                                    | Agent-based model   | General population              | Vaccine strategies       | A comparison of the prioritization strategies showed no significant difference in their impacts on pandemic mitigation                                                                                                                                                                                                                                                                                                                                         | 3 | Age, Occupation, Geographical location |
| Tran, 2021               | To evaluate age-based vaccine distributions on the pandemic                                                                                                                                                                                                         | Compartmental model | General population              | Vaccine strategies       | the study found that allocating a substantial proportion (> 75%) of vaccine supply to individuals over the age of 70 is optimal in terms of reducing total cumulative deaths through mid-2021                                                                                                                                                                                                                                                                  | 2 | Age, Occupation                        |
| Truszkowska, 2021        | To evaluate the effects of testing and vaccination on the pandemic                                                                                                                                                                                                  | Agent-based model   | General population              | Vaccine strategies, NPIs | Until widespread vaccination efforts are underway, maintaining a balance between safety and normalcy during the current COVID-19 crisis requires the use of non-pharmaceutical prevention measures as well as efficient detection strategies                                                                                                                                                                                                                   | 2 | Occupation, Geographical location      |
| Webb, 2021               | to predict the outcome of vaccine implementation for the mitigation of the COVID-19 epidemic in the US                                                                                                                                                              | Compartmental model | General population              | Vaccine strategies       | The model demonstrates that the subsiding of the epidemic as vaccination is implemented depends critically on the scale of relaxation of social measures that reduce disease transmission.                                                                                                                                                                                                                                                                     | 0 |                                        |
| Zhao, 2021               | To help inform campus level preparedness plans for adoption of face mask/physical-distancing, testing, remote instructions, and personnel scheduling, during non-availability or partial-availability of vaccines, in the event of SARS-Cov2-type disease outbreaks | Compartmental model | University population           | Vaccine strategies, NPIs | Lowering the population size to 34% or 44% of the actual population size, while maintaining contact rates at 4 or 7 among non-essential workers, would help control an outbreak. With at least 95% vaccine coverage, the campus can be kept at full population. If vaccine coverage is lower than 95%, mass testing at 25% per day is required if vaccine coverage is at 63-79%, and mass testing at 33% per day is required if vaccine coverage is at 53-68%. | 0 |                                        |
| Avila-Poncede Leon, 2022 | To model the transmission of the SARS-CoV-2 Delta variant in a partially vaccinated population                                                                                                                                                                      | Compartmental model | General population              | Vaccine strategies       | The results showed that a combination of strengthening vaccine-induced immunity and preventative behavioral measures like face mask-wearing and contact tracing would likely be required to deaccelerate the spread of infectious SARS-CoV-2 variants                                                                                                                                                                                                          | 0 |                                        |
| Belval, 2022             | To support prevention and mitigation efforts along with understanding potential impacts to the wildland firefighting workforce                                                                                                                                      | Agent-based model   | Wildland firefighting workforce | Vaccine strategies, NPIs | Vaccination and social distancing interventions are effective in reducing transmission of SARS-CoV-2 at fire incidents, leading to negligible infection rates, number of outbreaks, and worker days missed under a scenario of high compliance with recommended mitigations, including vaccination.                                                                                                                                                            | 0 |                                        |
| Bianchini, 2022          | To determine how risk tolerance and vaccination rates impact the rate at which a population can return to pre-pandemic contact behavior                                                                                                                             | Compartmental model | General population              | Vaccine strategies, NPIs | Coordination in decision-making across regions is essential to maintain the daily number of hospitalizations below desired limits. Increasing risk tolerance can decrease the number of days required to discontinue non-pharmaceutical interventions (NPIs), but at the cost of an increased number of deaths. Vaccination uptake of greater than 70% is needed to safely return to pre-pandemic behaviors                                                    | 0 |                                        |
| Bilinski, 2022           | To evaluate the costs and benefits of COVID-19 testing strategies in the context of full-time, in-person kindergarten through eighth grade (K-8) education at different community incidence levels.                                                                 | Agent-based model   | Schools population              | Vaccine strategies, NPIs | Test-to-stay policies were associated with minimal increases in transmission and reduced quarantine time across all levels of community incidence. The cost per infection averted in students and staff by weekly screening was lowest in schools with lower vaccination rates, fewer mitigation measures, and higher community transmission levels.                                                                                                           | 0 |                                        |

|                      |                                                                                                                                                                                                                                                                            |                     |                                |                                |                                                                                                                                                                                                                                                                                                                                                                                                                                                                                                                        |   |                            |
|----------------------|----------------------------------------------------------------------------------------------------------------------------------------------------------------------------------------------------------------------------------------------------------------------------|---------------------|--------------------------------|--------------------------------|------------------------------------------------------------------------------------------------------------------------------------------------------------------------------------------------------------------------------------------------------------------------------------------------------------------------------------------------------------------------------------------------------------------------------------------------------------------------------------------------------------------------|---|----------------------------|
| Blumberg, 2022       | To determine how different types of control interventions impact the expected number of symptomatic infections due to outbreaks in congregate settings                                                                                                                     | Compartmental model | Congregate settings population | Vaccine strategies , NPIs      | Vaccination or depopulation can have a greater than linear effect on the expected number of cases. For example, preemptively reducing the size of the susceptible population by 20% reduced overall disease burden by 47%                                                                                                                                                                                                                                                                                              | 0 |                            |
| Bracis, 2022         | To assess the benefits of offering vaccination to children ages 5–11                                                                                                                                                                                                       | Compartmental model | General population             | Vaccine strategies , NPIs      | Offering early vaccination to children aged 5-11 with 75% physical interactions in schools was predicted to prevent 756 hospitalizations, cutting youth hospitalizations in half compared to no vaccination. This would largely reduce the need for additional social distancing measures over the school year. If overall vaccination coverage reached 90%, 60% of remaining hospitalizations would be averted and the need for increased social distancing would almost certainly be avoided                         | 1 | Age                        |
| Chen, 2022           | To evaluate the effectiveness of the COVID-19 vaccination program in its early stage and predicted the path to herd immunity in the U.S.                                                                                                                                   | Compartmental model | General population             | Vaccine strategies             | By early March 2021, they estimated vaccination in the U.S. reduced the total number of new COVID-19 cases by 4.4 million, prevented approximately 0.12 million hospitalizations, and decreased the population infection rate by 1.34 percentage points .                                                                                                                                                                                                                                                              | 0 |                            |
| Chen, 2022           | proposes a framework for COVID-19 vaccine distribution that prioritizes disadvantaged communities based on community and societal risk indices. The framework shows that prioritizing disadvantaged communities can improve both social utility and equity simultaneously. | Compartmental model | General population             | Vaccine strategies             | Using this model, we find that social utility and equity can be simultaneously improved when vaccine access is prioritized for the most disadvantaged communities, which holds even when such communities manifest considerable vaccine reluctance. Nevertheless, equity among distinct demographic features may conflict; for example, low-income neighbourhoods might have fewer elder citizens.                                                                                                                     | 2 | Age, Geographical location |
| Fosdick, 2022        | to develop an agent-based model and an online dashboard interface that simulates COVID-19 infection within congregate care settings under various mitigation measures                                                                                                      | Agent-based model   | Congregate settings population | Vaccine strategies , screening | The results of the study suggest that low staff vaccination rates and relaxed screening protocols are two continued risks to long-term care facilities. The model suggests that outbreaks are likely to occur when 78% of residents and 37.5% of staff are vaccinated even with a weekly testing protocol in place. The study found that staff vaccination rates are the primary determinant of the total number of infections in both staff and residents                                                             | 0 |                            |
| Frazier, 2022        | To determine if and how Cornell should open up for in-person instruction                                                                                                                                                                                                   | Compartmental model | University population          | Vaccine strategies , NPIs      | Once-per-week asymptomatic screening of vaccinated undergraduate students provides substantial value against the Delta variant, even if all students are vaccinated. More targeted testing of the most social vaccinated students provides further value.                                                                                                                                                                                                                                                              | 1 | Age                        |
| Gavish, 2022         | To evaluate how different vaccine allocations to different age groups affect epidemic outcomes                                                                                                                                                                             | Compartmental model | Children                       | Vaccine strategies             | The study found that it is optimal to allocate vaccines to adolescents in the age group 10-19, even when they are assumed to be less susceptible than adults. It further found that age group 0-9 is included in the optimal allocation for sufficiently high values of the basic reproduction number                                                                                                                                                                                                                  | 1 | Age                        |
| Giardina , 2022      | To estimate the association between adding or removing in-school mitigation measures (eg, masks) and COVID-19 outcomes within an elementary school community at varying student vaccination and local incidence rates                                                      | Agent-based model   | School population              | Vaccine strategies , NPIs      | With student vaccination coverage of 70% or less and moderate assumptions about mitigation effectiveness (eg, masking), mitigation could only be reduced when local case incidence was 14 or fewer cases per 100 000 residents per day to keep the mean additional cases associated with reducing mitigation to 5 or fewer cases per month. To keep the probability of any in-school transmission to less than 50% per month, the local case incidence would have to be 4 or fewer cases per 100 000 residents per day | 0 |                            |
| Gomez-Vazquez , 2022 | To quantify the effect of testing and vaccine strategies on the attack rate, length of the epidemic, and hospitalization                                                                                                                                                   | Agent-based model   | Congregate settings population | Vaccine strategies , NPIs      | 3-day testing frequency minimized the attack rate and the time to eradicate an outbreak. Prioritization of vaccine among staff or staff and residents minimized the cumulative number of infections and hospitalization, particularly in the scenario of high probability of                                                                                                                                                                                                                                           | 0 |                            |

|                 |                                                                                                                                                                                                                                                                                                                                                 |                     |                       |                          |                                                                                                                                                                                                                                                                                                                                                                                                                     |   |                 |
|-----------------|-------------------------------------------------------------------------------------------------------------------------------------------------------------------------------------------------------------------------------------------------------------------------------------------------------------------------------------------------|---------------------|-----------------------|--------------------------|---------------------------------------------------------------------------------------------------------------------------------------------------------------------------------------------------------------------------------------------------------------------------------------------------------------------------------------------------------------------------------------------------------------------|---|-----------------|
|                 |                                                                                                                                                                                                                                                                                                                                                 |                     |                       |                          | an introduction. Reducing the probability of a viral introduction eased the demand on testing and vaccination rate to decrease infections and hospitalizations                                                                                                                                                                                                                                                      |   |                 |
| Grabowski, 2022 | To evaluate the spread of Omicron                                                                                                                                                                                                                                                                                                               | Compartmental model | General population    | Vaccine strategies       | The doubling time estimates for Omicron in South Africa's provinces, Gauteng and KwaZulu-Natal, were approximately 3.3 days and 2.7 days, respectively. Similar or even shorter doubling times were observed in other locations such as Australia, New York State, UK, and Denmark.                                                                                                                                 | 0 |                 |
| Hachtel, 2022   | To evaluate the effects of series of timed interventions that can account for the influence of real time changes in government policy and social norms on case numbers and deaths in the United States                                                                                                                                          | Compartmental model | General population    | Vaccine strategies, NPIs | The model effectively predicts the course of the pandemic under different intervention schedules and shows that without prompt effective interventions, the pandemic will be significantly extended and result in many millions of deaths in the US                                                                                                                                                                 | 0 |                 |
| He, 2022        | To examine the effect of global vaccination programs on the numbers of lives saved                                                                                                                                                                                                                                                              | Compartmental model | General population    | Vaccine strategies       | The study indicated that vaccination averted >1.5 million deaths in the studied countries until November 14, 2021, or at least precluded the need to reintroduce more stringent public health and social measures to control transmission.                                                                                                                                                                          | 0 |                 |
| Head, 2022      | To examine school reopening policies amidst ongoing transmission of the highly transmissible Delta variant, accounting for vaccination among individuals = 12 years                                                                                                                                                                             | Agent-based model   | University population | Vaccine strategies, NPIs | Universal masking reduced infections by over 57% among students, and masking combined with 70% vaccination coverage resulted in fewer than 50 excess cases per 1,000 students/teachers                                                                                                                                                                                                                              | 2 | Age, Occupation |
| Hekmati, 2022   | To determine the airborne transmission risk for COVID-19 for holding in-person classes when vaccination, variants, and non-pharmaceutical interventions are considered                                                                                                                                                                          | Compartmental model | University population | Vaccine strategies, NPIs | The study found that moving 90% of classes online can reduce new infections by up to 18 times. Universal mask usage can reduce new infections by up to 3.6 times. High vaccination rates are predicted to curb transmission even for more contagious variants of the virus                                                                                                                                          | 0 |                 |
| Hupert, 2022    | To determine how heterologous vaccination interventions (HVI) should be optimally implemented.                                                                                                                                                                                                                                                  | Compartmental model | General population    | Vaccine strategies       | Non-specific effects of non-COVID-19 vaccines, known as heterologous vaccine interventions (HVIs), can potentially reduce COVID-19 cases, hospitalizations, and mortality during a pandemic wave. HVIs can stimulate heterologous cross-protective effects, providing some protection against SARS-CoV-2 infection and amelioration of COVID-19 disease.                                                            | 0 |                 |
| Jhun, 2022      | To determine what optimal allocation strategy should be used based on the vaccine supply                                                                                                                                                                                                                                                        | Compartmental model | General population    | Vaccine strategies       | the fatality-based strategy, which is currently employed in many countries, is more effective when the contagion rate is high and vaccine supply is low, but the contact-based method outperforms the fatality-based strategy when there is a sufficiently high supply of the vaccine. Fatality approach: vaccinating those with higher death rates. Contact approach: vaccinating those with higher contact rates. | 0 |                 |
| Junge, 2022     | construct an agent-based SEIR model to simulate COVID-19 spread at a 16000-student mostly non-residential urban university during the Fall 2021 Semester, to find out if it is possible to safely reopen to in-person instruction with COVID-19 vaccination, and to determine the effectiveness of different scenarios for vaccine coverage and | Agent-based model   | University population | Vaccine strategies       | The study found that a combination of 100% mRNA vaccine coverage and weekly screening testing of 25% of the campus population makes it possible to safely reopen to in-person instruction.                                                                                                                                                                                                                          | 0 |                 |



|               |                                                                                                                                                                                                                                                                                                                          |                     |                    |                               |                                                                                                                                                                                                                                                                                                                                                                                                                                                                                                                                                                                                                                                                                        |   |                                 |
|---------------|--------------------------------------------------------------------------------------------------------------------------------------------------------------------------------------------------------------------------------------------------------------------------------------------------------------------------|---------------------|--------------------|-------------------------------|----------------------------------------------------------------------------------------------------------------------------------------------------------------------------------------------------------------------------------------------------------------------------------------------------------------------------------------------------------------------------------------------------------------------------------------------------------------------------------------------------------------------------------------------------------------------------------------------------------------------------------------------------------------------------------------|---|---------------------------------|
|               | vaccine effectiveness in controlling total infections                                                                                                                                                                                                                                                                    |                     |                    |                               |                                                                                                                                                                                                                                                                                                                                                                                                                                                                                                                                                                                                                                                                                        |   |                                 |
| Kadelka, 2022 | investigate, (i) how ethnic homophily and social interaction parameters affect the choice of optimal vaccine allocation strategy, and (ii) notwithstanding possible ethical concerns, whether differentiating by ethnicity in these strategies can lead to better societal outcomes (e.g., fewer deaths or fewer cases). | Compartmental model | General population | Vaccine strategies            | Allowing for differences in occupational risk level but no ethnic homophily, the 4-phase allocation strategy that minimizes mortality is first to vaccinate people 75 and older, then vaccinate people employed in high-contact jobs (e.g., healthcare and frontline essential workers), then people 65-74 years old, followed by the remainder of the population (This is consistent with the strategy suggested by the CDC)<br>In the scenario resembling the most likely social context the optimal 10-phase allocation strategy was better than any strategy with five or fewer phases. Taking ethnicity into account when prioritizing vaccine access may reduce COVID-19 deaths. | 3 | Age, Race/Ethnicity, Occupation |
| Kholi, 2022   | To estimate the number of infections and hospitalizations prevented by a booster strategy in those 18 years of age and older in the United States across a 6-month time horizon                                                                                                                                          | Compartmental model | General population | Vaccine strategies            | Vaccinating with mRNA-1273(Sept), mRNA-1273.214(Sept), and mRNA-1273.222(Nov) is predicted to reduce infections by 34%, 40%, and 18%, respectively, and hospitalizations by 42%, 48%, and 25%, respectively, over 6 months compared to no booster.                                                                                                                                                                                                                                                                                                                                                                                                                                     | 1 | Age                             |
| Kim, 2022     | to evaluate the interactions between the speed of distribution and efficacy against infection of multiple vaccines when variants emerge and assessing the level of infection attack rate                                                                                                                                 | Compartmental model | General population | Vaccine strategies            | the speed of vaccine distribution is a crucial factor in achieving low infection attack rates (IAR) during a pandemic, along with vaccine efficacy against both the original strain and emerging variants.                                                                                                                                                                                                                                                                                                                                                                                                                                                                             | 0 |                                 |
| Kumar, 2022   | To assess the effect of testing on a vaccinated population                                                                                                                                                                                                                                                               | Agent-based model   | General population | Vaccine strategies, screening | Testing strategies that combine Reverse Transcriptase Polymerase Chain Reaction (RT-PCR) assays, rapid antigen tests, and vaccinations are effective in mitigating an emerging COVID-19 outbreak driven by vaccine-evasive variants of concern.                                                                                                                                                                                                                                                                                                                                                                                                                                        | 1 | Age                             |
| Ledder, 2022  | To look at the effect of vaccination and NPIs (mentioned as contact factor) on outcomes                                                                                                                                                                                                                                  | Compartmental model | General population | Vaccine strategies, NPIs      | Vaccination non-acceptance does not matter as much until the supply is greater than demand (later on in the pandemic). Vaccine infrastructure for manufacturing and distribution is more important than vaccine acceptance. Decreasing the contact factor remains more important than the vaccination amount.                                                                                                                                                                                                                                                                                                                                                                          | 0 |                                 |
| Li, 2022      | To look at the effect of vaccine allocation globally                                                                                                                                                                                                                                                                     | Agent-based model   | General population | Vaccine strategies            | Inoculating at least 10%, 20%, and 26% of populations in all countries requires 1.12, 3.31, and 5.00 million additional vaccine doses every day, respectively. Achieving these benchmarks reduces new cases by 0.56, 2.74, and 3.32 million, respectively. If allocated by the current global distribution, 5.00 million additional vaccine doses will only avert 1.45 million new cases. If those 5.00 million vaccines are allocated based on projected cases in each country, the averted cases will increase more than six-fold to 9.20 million.                                                                                                                                   | 3 | Age, Gender, Race / Ethnicity   |
| Li, 2022      | To look at the effect of age-specific vaccine allocation                                                                                                                                                                                                                                                                 | Compartmental model | General population | Vaccine strategies            | Allocating an additional 100,000 doses of vaccine to the 0-17 and 75-100 age groups by June 1, 2021, with an allocation of 80% to the 0-17 age group and 20% to the 75-100 age group would simultaneously reduce the maximum numbers of new infections and deaths in NYC                                                                                                                                                                                                                                                                                                                                                                                                               | 1 | Age                             |
| Lin, 2022     | To estimate the effects of the vaccine campaign on the United States                                                                                                                                                                                                                                                     | Compartmental model | General population | Vaccine strategies            | The paper compared two approaches to model the effectiveness of the vaccination campaign in the US and found that both approaches yielded almost identical results, indicating that the vaccination campaign was effective in controlling the epidemic in the US                                                                                                                                                                                                                                                                                                                                                                                                                       | 0 |                                 |

|                  |                                                                                                                                                                                                                            |                     |                       |                               |                                                                                                                                                                                                                                                                                                                                                                                                                                                       |   |     |
|------------------|----------------------------------------------------------------------------------------------------------------------------------------------------------------------------------------------------------------------------|---------------------|-----------------------|-------------------------------|-------------------------------------------------------------------------------------------------------------------------------------------------------------------------------------------------------------------------------------------------------------------------------------------------------------------------------------------------------------------------------------------------------------------------------------------------------|---|-----|
| Liu, 2022        | To study the impact of media coverage on vaccine willingness and health outcomes                                                                                                                                           | Compartmental model | General population    | Vaccine strategies            | It was found that timely response to media reports and increased media influence intensity were crucial for effective epidemic control.                                                                                                                                                                                                                                                                                                               | 0 |     |
| Mallela, 2022    | To evaluate transmissibility/reproduction numbers across different states in the United States                                                                                                                             | Compartmental model | General population    | Vaccine strategies            | Transmission varies greatly across states; some states will have more difficulty achieving herd immunity than others. As of September 20, 2021, no state has achieved herd immunity. Herd immunity may not be achievable through vaccination alone.                                                                                                                                                                                                   | 0 |     |
| Ngonghala, 2022  | To study the transmission dynamics of two of these variants (Delta and Omicron) in the US, in the presence of vaccination, treatment of individuals with clinical symptoms of the disease and the use of face masks.       | Compartmental model | General population    | Vaccine strategies, NPIs      | we showed that the vaccine-derived herd immunity can be achieved in the United States (so that the pandemic will be eliminated) if at least 68% of the population is fully vaccinated with two of the three vaccines approved for use in the United States (Pfizer or Moderna vaccine)                                                                                                                                                                | 0 |     |
| Pantah, 2022     | to study the impact of vaccination on COVID-19 transmission dynamics in Dougherty county, Georgia, USA as a case study for rural counties across the nation.                                                               | Compartmental model | General population    | Vaccine strategies            | The surge in the COVID-19 cases occurred after the lifting of the restriction policies, after increasing human activities such as protests and gatherings, and public holidays. The cases decline after the implementation of restrictions in public gatherings, social distancing, shelter-in-place, and the start of vaccination.                                                                                                                   | 0 |     |
| Paris, 2022      | to investigate the impacts of unvaccinated subpopulations on herd immunity and analyzed different scenarios to quantify which subpopulations and vaccine characteristics most impact infection levels in the United States | Compartmental model | General population    | Vaccine strategies            | The numerical simulation results show that in a heterogeneously vaccinated population (corresponding to 0%, 31%, 59.5%, and 75.3%), herd immunity cannot be achieved. Under this current landscape, our results show that while 16+ have the largest proportion of infections, the two youngest age groups (ages 0-4 and 5-11) are disproportionately affected, since they make up ~ 15% of the population but contribute to ~ 38% of the infections. | 1 | Age |
| Piccirillo, 2022 | To assess the impact of the vaccination in combination with a restriction parameter that represents non-pharmaceutical interventions measures applied to the compartmental SEIR model to control the COVID-19 epidemic     | Compartmental model | General population    | Vaccine strategies, NPIs      | Vaccination can reduce the peaks of infections and the duration of the pandemic. Vaccination combined with governmental actions (like non-pharmacological ones) are capable to minimize the infected peaks.                                                                                                                                                                                                                                           | 0 |     |
| Rabil, 2022      | To develop effective screening and vaccination strategies, customized for a college campus, to reduce COVID-19 infections, hospitalizations, deaths, and peak hospitalizations.                                            | Compartmental model | University population | Vaccine strategies, screening | With low initial vaccine coverage (30% in our study), even aggressive vaccination and screening result in a high number of infections: 1,020 to 2,040 (1,530 to 2,480) with routine daily (every other day) screening of the unvaccinated; 280 to 900 with daily screening extended to the newly vaccinated in base- and worst-case scenarios, which respectively consider reproduction numbers of 4.75 and 6.75 for the Delta variant.               | 0 |     |
| Rabil, 2022      | to develop screening guidelines for the safe opening of college campuses, considering COVID-19 infections/hospitalizations/deaths; peak daily hospitalizations; and the tests required.                                    | Compartmental model | University population | Vaccine strategies, screening | Using the Spring 2022 academic semester as a case study, we study various routine screening strategies, and find that screening the faculty/staff less frequently than the students, and/or the boosted and vaccinated less frequently than the unvaccinated, may avert a higher number of infections per test, compared to universal screening of the entire population at a common frequency.                                                       | 0 |     |
| Rao, 2022        | To develop a model to guide the allocation of vaccines over time with the objectives: of minimizing new infections, deaths, life years lost, or QALY lost due to death                                                     | Compartmental model | General population    | Vaccine strategies            | This method generates a prioritized list of population groups for vaccine allocation, for example COVID-19 vaccine, to minimize new infections in the first period: priority order for vaccination is first individuals aged 20–39, then individuals under age 20, then individuals aged 40–65, and finally individuals over age 65.                                                                                                                  | 1 | Age |

|                                                                                                                                                                                                                                                           |                                                                                                                                                                                                                                                                                                                                                     |                     |                                |                          |                                                                                                                                                                                                                                                                                                                                                                                                                                                                                                                                                                                             |   |                                |
|-----------------------------------------------------------------------------------------------------------------------------------------------------------------------------------------------------------------------------------------------------------|-----------------------------------------------------------------------------------------------------------------------------------------------------------------------------------------------------------------------------------------------------------------------------------------------------------------------------------------------------|---------------------|--------------------------------|--------------------------|---------------------------------------------------------------------------------------------------------------------------------------------------------------------------------------------------------------------------------------------------------------------------------------------------------------------------------------------------------------------------------------------------------------------------------------------------------------------------------------------------------------------------------------------------------------------------------------------|---|--------------------------------|
| Safdar, 2022                                                                                                                                                                                                                                              | assess the population-level impact of vaccination and booster shots accounting for waning and boosting of immunity against omicron variant                                                                                                                                                                                                          | Compartmental model | General population             | Vaccine strategies       | That the prospect for the effective control and mitigation (and, consequently, elimination) of the COVID-19 pandemic in the United States is very promising using a combined vaccination-boosting strategy, provide the vaccinate and boosting coverages are moderately high enough.                                                                                                                                                                                                                                                                                                        | 0 |                                |
| Singh, 2022                                                                                                                                                                                                                                               | To investigate the role of vaccination coverage in the management of future COVID-19 outbreaks in nursing homes and explore the potential benefits of maintaining adequate adherence to recommended use of PPE by nursing home staff for reducing or preventing the risk of SARS-CoV-2 introduction and future COVID-19 outbreaks in nursing homes. | Compartmental model | Congregate settings population | Vaccine strategies       | At HCP vaccination coverage of 60%, the probability of an outbreak was below 20% for community coverage of 50% or above. At high coverage, stopping asymptomatic screening and facility-wide testing yielded similar results                                                                                                                                                                                                                                                                                                                                                                | 0 |                                |
| Taboe, 2022                                                                                                                                                                                                                                               | 1) to investigate the impact of each vaccine type and booster doses (single/double) on the incidence of COVID-19 in the U.S., and 2) to predict future trends of the disease in the U.S., if existing control measures are reinforced or relaxed.                                                                                                   | Compartmental model | General population             | Vaccine strategies       | Our findings suggest that booster shots with the Pfizer-BioNTech or Moderna vaccines conferred superior protection than those with the Johnson & Johnson vaccine. Furthermore, the simulations show that the baseline value of the new daily cases at the peak of the Omicron variant in January 2022 would have dropped significantly (by ~ 20%) if a fourth dose of the Pfizer-BioNTech or Moderna vaccine was administered at the start of the Omicron wave. Specifically, three million cumulative cases in the U.S. could have been averted between late November 2021 and March 2022. | 0 |                                |
| Walker, 2022                                                                                                                                                                                                                                              | To support the development of this guidance for ACIP -- recommended phased allocation of SARS-CoV-2 vaccines                                                                                                                                                                                                                                        | Compartmental model | General population             | Vaccine strategies       | <ul style="list-style-type: none"> <li>- Strategies of subsequently prioritizing adults aged <math>\geq 65</math> years, or a combination of essential workers and adults aged <math>\geq 75</math> years, prevented the most deaths.</li> <li>- Meanwhile, prioritizing adults with high-risk medical conditions immediately after HCP prevented the most infections.</li> <li>- All three strategies prevented a similar fraction of hospitalizations.</li> </ul>                                                                                                                         | 3 | Age, Occupation, Comorbidities |
| Yang, 2022                                                                                                                                                                                                                                                | To assess the mitigation strategies (relaxation of NPIs, and adoption of NPIs) needed for safe university reopening in the 2021 autumn semester considering different immunization effectiveness                                                                                                                                                    | Agent-based model   | University population          | Vaccine strategies, NPIs | 80% vaccination is needed for safe university reopening without non-pharmaceutical interventions (masks); 60% vaccination is needed with non-pharmaceutical interventions                                                                                                                                                                                                                                                                                                                                                                                                                   | 1 | Age                            |
| *: 5 factors in this study were Age, comorbidities, prison security level, prison room sizes, and prison activities. For this study, the factors included in our synthesis were age, comorbidities, due to other factors very specific for prison setting |                                                                                                                                                                                                                                                                                                                                                     |                     |                                |                          |                                                                                                                                                                                                                                                                                                                                                                                                                                                                                                                                                                                             |   |                                |

**Supplementary Table 2: Characteristics of studies incorporating social determinants of health factors**

| Author      | Year | Model type          | Demographic factor |                 |        |               | Social Determinants of Health factor |                       |                  |
|-------------|------|---------------------|--------------------|-----------------|--------|---------------|--------------------------------------|-----------------------|------------------|
|             |      |                     | Age                | Race/ Ethnicity | Gender | Comorbidities | Occupation                           | Geographical location | Living condition |
| Awad        | 2021 | Compartmental model | No                 | No              | No     | No            | No                                   | Yes                   | No               |
| Buckner     | 2021 | Compartmental model | Yes                | No              | No     | No            | Yes                                  | No                    | No               |
| Islam       | 2021 | Compartmental model | Yes                | No              | No     | Yes           | Yes                                  | No                    | Yes              |
| Patel       | 2021 | Agent-based model   | Yes                | Yes             | No     | No            | No                                   | Yes                   | Yes              |
| Tatapudi    | 2021 | Agent-based model   | Yes                | No              | No     | No            | Yes                                  | Yes                   | No               |
| Tran        | 2021 | Compartmental model | Yes                | No              | No     | No            | Yes                                  | No                    | No               |
| Truszkowska | 2021 | Agent-based model   | No                 | No              | No     | No            | Yes                                  | Yes                   | No               |
| Chen        | 2022 | Compartmental model | Yes                | No              | No     | No            | No                                   | Yes                   | No               |
| Head        | 2022 | Agent-based model   | Yes                | No              | No     | No            | Yes                                  | No                    | No               |
| Kadelka     | 2022 | Compartmental model | Yes                | Yes             | No     | No            | Yes                                  | No                    | No               |
| Walker      | 2022 | Compartmental model | Yes                | No              | No     | Yes           | Yes                                  | No                    | No               |
